1 The localization of chitin synthase mediates the patterned deposition of chitin in developing *Drosophila*  
2 bristles.

3 Paul N. Adler

4 Biology Department

5 Cell Biology Department

6 University of Virginia

7 Charlottesville, VA 22904

8

9

10

11

12

13

14

15

16

17

18

19

20

21

22

23

24

25

26

27 **Abstract**

28

29 The insect exoskeleton is a morphologically complex structure that is a key for the life style of this very  
30 successful group of animals. The cuticular cytoskeleton contains proteins, lipids and the N-acetyl  
31 glucosamine polymer chitin. Chitin is a highly patterned and essential component of the insect  
32 exoskeleton synthesized by chitin synthase. In most body regions chitin fibrils are found in a stack of  
33 parallel arrays that can be detected by transmission electron microscopy. Each array is rotated with  
34 respect to the layers above and below. In sensory bristles, chitin primarily accumulates in bands parallel  
35 to the proximal/distal axis of the bristle. These bands are visible by confocal microscopy providing  
36 experimental advantages. We have used this cell type and an edited chitin synthase gene to establish  
37 that the bands of chitin are closely associated with stripes of chitin synthase. This argues that the  
38 localization of chitin synthase plays an important role in mediating the patterned deposition of chitin in  
39 insect cuticle. However, other data suggest this connection may not be absolute. Several genes are  
40 essential for proper chitin deposition. We found one of these, *Rab11* is required for the insertion of  
41 chitin synthase into the plasma membrane and a second, *duskylike* is required for plasma membrane  
42 chitin synthase to properly localize into stripes. We also established that the actin cytoskeleton is  
43 required for the proper localization of chitin synthase and chitin in developing sensory bristles. An  
44 unexpected finding is that chitin synthase and other membrane proteins are shed during or after the  
45 process of cuticle deposition and this may explain cases where there is a lack of a sharp phenotypic  
46 boundary between cells that have or lack chitin synthase activity.

47

48

49

50

51

52

53

54

55

56

57

58

## 59 Introduction

60 Chitin is an abundant and widespread extracellular polymer found in many types of eukaryotic  
61 organisms from fungi to vertebrates. It is synthesized by the multi-pass transmembrane enzyme Chitin  
62 Synthase (CS). This enzyme has principally been studied in fungi and insects, where chitin plays  
63 important structural roles. In fungi chitin is a constituent of the cell wall and the number of CS genes is  
64 quite variable (Merzendorfer, 2011). For example, *S. cerevisiae* has 3 CS genes (Gohlke et al., 2017)  
65 while *Aspergillus fumigatus* has 8 (Muszkieta et al., 2014). Chitin in fungal cell walls is not uniformly  
66 distributed and in these systems different CS's appear to have different subcellular localizations and to  
67 mediate chitin synthesis in different parts of the cell wall including the bud ring (Cabib and Bowers,  
68 1971; Foltman et al., 2018). In insects, chitin is a major component of the cuticular exoskeleton, the  
69 apical surface of trachea and the peritrophic membrane that lines the gut (Merzendorfer, 2011). In the  
70 cuticle, it is in parallel arrays while in the peritrophic membrane it is a fibrous mesh. There are two CS  
71 genes in insects, one functions in the formation of the cuticular exoskeleton and tracheal lining and the  
72 other synthesizes the chitin found in the peritrophic membrane (Merzendorfer, 2011). In *Drosophila* the  
73 chitin synthase enzyme required for the synthesis of cuticle chitin is encoded by the *kkv* gene (Moussian  
74 et al., 2005; Ostrowski et al., 2002). On the surface, the larger number of CS encoding genes in fungi is  
75 surprising as the insect exoskeleton is a morphologically more complicated and varied structure than the  
76 fungal cell wall.

77 The most conserved region in all chitin synthases is the catalytic domain (con1) (Dorfmueller et al., 2014;  
78 Nagahashi et al., 1995; Yabe et al., 1998) and this region is essential and sufficient for chitobiose  
79 synthesis by SC-CHS2. A second conserved region (con2-ref) is essential for the synthesis of long chito-  
80 oligosaccharide, and seems likely to be essential for the translocation of growing chitin chains  
81 (Dorfmueller et al., 2014; Yabe et al., 1998). Con1 from SC-CHS2 shows substantially higher sequence  
82 conservation than con2, but both can be recognized in insect chitin synthases such as *Drosophila* Kkv.  
83 Both of these regions are thought to be cytoplasmic in yeast CHS2, although there is evidence for two  
84 transmembrane domains separating the catalytic site from at least the c terminal most part of Con2  
85 (Gohlke et al., 2017). The insect cuticle CS is typically larger than most fungal CS proteins. For  
86 example, the *Drosophila* CS1 contains 1615 amino acids while yeast CHS3 contains 1165 amino acids.  
87 The larger size might allow the insect protein to interact with a larger number of other proteins and this  
88 could be important in the development of the morphological complexity of insect cuticle. All CS are  
89 multi-pass transmembrane proteins. The number of inferred transmembrane domains varies from ~5 to  
90 18 with fungal CS proteins generally predicted to contain many fewer putative transmembrane domains  
91 than insect CS proteins (Gohlke et al., 2017; Merzendorfer, 2011) (Merzendorfer and Zimoch, 2003).  
92 However, since different programs predict different numbers of transmembrane domains for individual  
93 CS until direct experimental data provides answers there will be uncertainty (Gohlke et al., 2017).  
94 Indeed, in the case of fungal chitin synthases direct experimental data established that the computer  
95 programs for predicting transmembrane domains are useful but not able to accurately predict  
96 membrane protein topology (Gohlke et al., 2017). We report here experimental evidence that the  
97 amino terminus of *Drosophila* Kkv is in the cytoplasm and the carboxy terminus in the extracellular  
98 space.

99 The arrangement of chitin in insect cuticle may differ in different structures. Over most of the cuticle  
100 chitin is found in layers of parallel arrays of chitin fibrils with each layer rotated with respect to its  
101 neighbors above and below (Bouligand, 1972; Moussian, 2013; Moussian et al., 2006a). As assayed by  
102 confocal microscopy, in the cuticle that covers the shaft of sensory bristles chitin is most abundant in  
103 bands that run parallel to the proximal-distal axis of the bristle (Nagaraj and Adler, 2012). In  
104 transmission electron micrographs we did not see evidence for the presence of chitin layers in bristles or  
105 in hairs (trichomes), but whether this represents a true difference or is a consequence of a higher  
106 density of cuticle proteins masking the layers remains uncertain. In this paper we make use of the  
107 bristle shaft as a model cell type to study patterned chitin deposition in insects. The large size of these  
108 polypoid cells makes them favorable for this purpose.

109 The insect cuticle Chitin synthase has been particularly difficult to study in vitro and what is known  
110 about it and the process of chitin deposition is relatively limited (Merzendorfer, 2011). Chitin fibrils are  
111 insoluble at physiological pH (Elieh-Ali-Komi and Hamblin, 2016), which restricts models for how  
112 patterned chitin deposition can be mediated at the cellular level (Fig 1A). One possibility is that in  
113 insects as in fungi CS is localized in a patterned way to specific membrane domains and chitin deposition  
114 is directly patterned by this. In insect epidermal cells rows of elevated membrane called undulae have  
115 been proposed to be the site of chitin deposition (Moussian et al., 2007) (Moussian et al., 2006a). The  
116 tips of the undulae are associated with extracellular matrix (Moussian et al., 2006a) (Adler, 2017) but it  
117 is not clear if this material is composed of chitin, cuticle proteins, other extracellular  
118 proteins/carbohydrate or more than one of these. Interestingly, prominent undulae are not seen  
119 during the deposition of some chitin containing cuticle, for example the cuticle that covers wing hairs or  
120 bristles (Adler, 2017; Sobala and Adler, 2016). Thus, it seems unlikely that undulae per se are essential  
121 for chitin or cuticle deposition. An alternative model is that the synthesis of chitin is not patterned but  
122 that chitin binding proteins bind to chitin fibrils as they are extruded through the membrane and serve  
123 as carriers to mediate the movement of the chitin to the correct place in the developing cuticle. There  
124 are a large number of proteins encoded by insect genomes that contain a chitin binding domain and  
125 could be part of such a system (Karouzou et al., 2007; Willis, 2010). In such a model, it seems likely that  
126 one or more unidentified proteins are first deposited in a patterned way and they interact with the  
127 chitin binding protein-chitin complex to guide the location for chitin fibril deposition. A third model is  
128 that CS containing exosomes/chitosomes are secreted and these are guided to the correct location for  
129 patterned chitin fibril deposition by interactions between exosome membrane proteins and one or more  
130 cuticle components. There are suggestions in support of this sort of model in the literature but evidence  
131 for exosomes has not been reported in transmission EM studies on cuticle deposition in *Drosophila* (e.g.  
132 (Sobala and Adler, 2016)). However, here we report evidence that *Kkv* (i.e. *Drosophila* CS) is shed during  
133 or after the synthesis of the pupal cuticle consistent with a possible exosome model. One difference  
134 between the three models is that the first predicts that *kkv* should act strictly cell autonomously while  
135 the second and third models suggest the possibility of limited cell non-autonomy. Previous experiments  
136 have described *kkv* as acting cell autonomously (Ren et al., 2005) (Adler et al., 2013) but we show here  
137 experimental evidence that argues for a small degree of non-autonomy.

138 As noted above the accumulation of chitin in the cuticle of *Drosophila* sensory bristles occurs primarily  
139 in bands parallel to the long axis of the bristle (Nagaraj and Adler, 2012) and we have used this to  
140 examine the relationship between the localization of Chitin Synthase (Kkv) to the patterned  
141 accumulation of chitin. We find Kkv is closely associated with these chitin bands during cuticle  
142 deposition. Notably, this is true even when both patterns are highly abnormal. The accumulation of Kkv  
143 is not smooth like the chitin bands but is punctate. To clarify the text we use stripes to describe the  
144 accumulation of Kkv and bands to describe chitin. We previously identified several genes whose  
145 function was essential for the accumulation of bristle chitin in parallel bands (Nagaraj and Adler, 2012).  
146 Knocking down the function of two of these genes resulted in a failure of the accumulation of Kkv in  
147 stripes. These observations link the patterning of extracellular chitin to the patterning of Kkv  
148 localization in the apical plasma membrane of epithelial cells and begin the identification of genes that  
149 mediate both the insertion of Kkv into the plasma membrane and the organization of Kkv in stripes  
150 along the proximal distal axis of the bristle.

151 We also observed that a putative catalytically inactive Kkv did not localize properly suggesting the  
152 possibility that the secretion of chitin is important for either the establishment or maintenance of Kkv  
153 localization. A second possibility is that the active site mutation altered the structure of the protein and  
154 that led to the abnormal localization.

155

156

## 157 **Results**

### 158 **Generation and characterization of transgenes and edited genes that encode tagged Kkv.**

159 As a first step in examining the role of CS localization in the patterning of chitin deposition we generated  
160 a series of new genetic reagents consisting of 4 different *UAS-kkv* transgenes and two edits of the  
161 endogenous *kkv* gene (Fig 1BC) (see Methods for details).

162 In one of the *UAS* transgenes the *kkv* open reading frame was tagged on the C terminus by the bright  
163 mNeonGreen (NG) fluorescent protein (Shaner et al., 2013) (*UAS-kkv::NG*). In a second it was tagged by  
164 the ollas epitope tag (Park et al., 2008) and his<sub>6</sub> (*UAS-kkv-OH*). We also examined a variant of the NG  
165 tagged protein that contained the amino acid change found in the amorphic *kkv-1* allele (R896K)  
166 (Moussian et al., 2005). In the fourth, multiple changes were made to the catalytic domain to change  
167 convert it to a mosquito sequence. At most only quite modest gain of function phenotypes were  
168 observed when either of these transgenes were over expressed (see Supplementary Text File 1 and Fig  
169 S1). It is not surprising that our *UAS* transgenes do not show dramatic gain of function phenotypes as  
170 Moussian and colleagues (Moussian et al., 2015a) have established that Kkv requires a second protein  
171 (MH2 domain containing - either Reb or Exp) for the accumulation of chitin.

172 We used CRISPR/Cas9 and Homology Dependent Repair (HDR) to edit the endogenous *kkv* gene to add  
173 two different C terminal tails (see methods for details). In one we added the mNeonGreen fluorescent

174 protein (NG) (Shaner et al., 2013) while in the second we added *smFP-HA* (Viswanathan et al., 2015) (Fig  
175 1BC), which is a variant of super folder GFP with multiple HA tags inserted into loops of GFP. Both  
176 *kkv::NG* and *kkv::smFP-HA* were homozygous viable and showed no mutant phenotypes under a stereo  
177 microscope. Homozygous *kkv::NG* flies also showed no morphological defects when we examined  
178 mounted cuticle by compound light microscopy or scanning electron microscopy (Fig 2EF, S2CD). This  
179 was also true for *kkv::NG/DF* and *kkv::NG/kkv<sup>1</sup>*. The data establish the edited gene and protein are close  
180 to if not functionally equivalent to wild type. When we examined *kkv::smFP-HA* cuticle by SEM or  
181 compound light microscopy we detected a mutant phenotype in wing hairs consisting primarily of thin  
182 and bent hairs (Figs 2EF, S2A). The phenotype appeared slightly stronger in *kkv::smFP-HA/Df* flies but  
183 we did not attempt to quantify this (Fig S2AB). In *ap-Gal4; UAS-kkv::NG kkv::smFP-HA/kkv::smGFP-HA*  
184 and *ap-Gal4; UAS-kkv::NG kkv::smFP-HA/Df(3R)ED5156* flies the wing hair phenotype was rescued in the  
185 dorsal wing cells where *ap* drives expression of *kkv::NG* but not in the ventral wing cells that served as  
186 an internal control (Fig 2GH). Similar results were obtained when *UAS-kkv-OH* was substituted for *UAS-*  
187 *kkv::NG*. We examined pupae that expressed *Kkv::NG* and *Kkv::smFP-HA* by in vivo confocal imaging.  
188 The level of fluorescence was much higher for *Kkv::NG* (we estimate it as being ~15X brighter (see  
189 Methods and Fig S3)) and hence we used it for all of the protein localization experiments described  
190 below. These data are consistent with *kkv::smFP-HA* being a viable hypomorphic allele of *kkv* where a  
191 lower than normal level of protein accumulates. The hair phenotype is likely due to this structure  
192 requiring a higher level of chitin for normal morphogenesis.

193

#### 194 **Subcellular Localization of Kkv**

195 We first used the *UAS* transgenes to examine the subcellular localization of *Kkv*. *Kkv::NG* localized on  
196 the apical surface of the large polytene salivary gland cells of *ptc>kkv::NG* larvae (Fig S4I). The large size  
197 of these cells makes them favorable for detecting the apical localization. In wing discs of *ptc>kkv::NG*  
198 larvae we observed the expected stripe of expression (Fig S5A) in the middle of the wing. We did not  
199 see any evidence for the secretion of *Kkv::NG* in these experiments. As an internal positive control, the  
200 larvae also expressed a secreted ChtVis-tdTomato chitin reporter (in red) (Sobala et al., 2015). As  
201 expected, Cht-Vis could be detected in the extracellular space between the disc epithelium and  
202 peripodial membrane cells. The stripe of *Kkv::NG* was obvious in living wing discs and in fixed wing discs  
203 stained with anti-NG antibodies, establishing that these antibodies did not cross-react with endogenous  
204 proteins in wing cells. As is elaborated later, similar specificity was observed for *ptc>kkv::OH* using an  
205 anti-ollas monoclonal antibody and when we used a rabbit polyclonal antibody (*anti-Kkv-M*) made  
206 against a region from the central part of the *Kkv* protein (aa1097-1246) to stain the stripe of *Kkv::NG*  
207 expression in wing discs. In Z sections we observed that *Kkv::NG* was preferentially localized to the  
208 apical surface of the wing disc cells (Fig S5B, arrow), as expected for a protein involved in the synthesis  
209 of a cuticle component and is consistent on observations of others in different contexts (Maue et al.,  
210 2009; Moussian et al., 2015; Zimoch and Merzendorfer, 2002). We also examined fixed *ap>kkv::NG*  
211 pupal wings where F-actin was stained with Alexa 568 phalloidin and *Kkv-NG* by anti-NG antibody (Fig  
212 4G-L). As expected for a transmembrane protein *Kkv::NG* was localized external to the actin filaments  
213 found in the center of growing hairs (Fig 3G-I) (Adler et al., 2013; Turner and Adler, 1998; Wong and

214 Adler, 1993). This close localization is reminiscent of the apical F-actin and chitin in wing hairs (Adler et  
215 al., 2013) and in late stages of trachea development in *Drosophila* embryos (Ozturk-Colak et al., 2016).  
216 At this stage when cell flattening and wing expansion is under way, a large disc of F-actin is seen under  
217 each hair (Fig 3K) (Adler et al., 2013). We did not observe a similar disc of Kkv::NG in such wings (Fig 4J).  
218 Thus, we conclude there is not a universal connection between the localization of sub membranous F-  
219 actin and Kkv in the juxtaposed membrane (Fig 3K).

220 When expressed in developing bristles by *neur-Gal4*, Kkv::NG accumulated in a manner similar to, albeit  
221 perhaps a bit less precisely than that seen for the protein encoded by the edited endogenous gene (see  
222 Fig 4ABDG). Most of our localization experiments used the edited endogenous gene to eliminate  
223 potential over expression issues. However, for some experiments that required immunostaining the use  
224 of the UAS transgenes was valuable as it allowed us to examine younger animals where cuticle  
225 deposition had not made immunostaining problematic.

226 The use of the Neon Green (and Ollas-His<sub>6</sub>) tag to localize Kkv requires that the tag remains associated  
227 with the enzyme to provide a meaningful localization. Since chitin synthases are often cleaved and in  
228 some cases this has been linked to enzyme activation (Broehan et al., 2007; Merzendorfer and Zimoch,  
229 2003) (Zhang and Zhu, 2013) this is a concern (we have also seen evidence for cleavage of Kkv on  
230 Western blots - pna, preliminary results). To test if the tags remained associated with the enzyme we  
231 stained pupae where *UAS-kkv::NG* expression was driven by *neur-Gal4* using both a commercially  
232 available anti-NG monoclonal and our anti-Kkv-M rabbit polyclonal antibody. We observed a clear co-  
233 localization in stripes of puncta along the proximal distal axis in bristles using the two antibodies (Fig 4  
234 DEF). This establishes that the neon green tag from the fusion protein is an accurate reporter for the  
235 Kkv protein. We also carried out similar co-localization experiments on *neur>kkv::OH* pupae and  
236 observed a similar co-localization using anti-Ollas and anti-Kkv antibodies (Fig 4 GHI). We found similar  
237 results for the accumulation of Kkv::NG in pupal wings and wing hairs when expression was driven by  
238 *ap-Gal4* (Fig 4MNO).

239

#### 240 **Localization of Kkv encoded by the edited endogenous gene:**

241 We first examined the accumulation of Kkv::NG from the edited endogenous gene in pupal wings as this  
242 tissue is the best characterized for the timing of cuticle deposition and gene expression (Adler et al.,  
243 2013; Sobala and Adler, 2016). Previously we found that we could first detect chitin in pupal wings in  
244 developing hairs around 42 hr after white prepupae (awp) (Adler et al., 2013). We observed Kkv::NG in  
245 developing hairs in living pupal wings at 42, 49 and 58 hrs awp (after white pupae) (Fig 3C). The level of  
246 fluorescence was lower in 42 hr hairs than in 49 hr hairs. We could also detect Kkv::NG fluorescence in  
247 the apical surface of wing cells with higher levels at cell boundaries. This was a bit surprising since the  
248 procuticle is not being made and we have not detected chitin in the wing blade at this time (Adler et al.,  
249 2013; Sobala and Adler, 2016). We also examined pupal wings that were younger than 40 hrs awp.  
250 Confocal images of such wings did not show any fluorescence when examined under the same  
251 conditions as >40 hr wings (Fig 3A). However, in digitally enhanced images we detected the

252 accumulation of Kkv::Ng in what is likely the proximal part of the hair (Fig 3B). In older wings (e.g. 76  
253 hr) during the middle of procuticle deposition the apical membrane fluorescence was stronger than at  
254 earlier times and we could see the pedestals that the hairs are found on at late stages (Fig 3F) (Sobala  
255 and Adler, 2016). As noted above, similar, albeit a bit messier results were obtained when we examined  
256 *ap>kkv::NG* pupal wings.

257 We next examined the localization of Kkv::NG in thoracic bristles by in vivo imaging from ~40-80 hr awp.  
258 Previously we found that chitin accumulated in bands along the proximal distal axis of thoracic bristles  
259 starting around 42 hr awp (Nagaraj and Adler, 2012). The level of Kkv::NG fluorescence in younger than  
260 50hr awp bristles was lower than in older bristles. (Fig S6). At both early and later stages, Kkv::NG  
261 fluorescence had a punctate appearance within an overall pattern of stripes along the proximal distal  
262 axis of the bristle (Figs 4A-C, 5J, S5E, S6). In some samples, we observed what appeared to be a pair of  
263 relatively closely situated stripes. As development proceeded, the stripes became more complete  
264 although they never reached the completeness and smoothness seen with chitin bands. In older  
265 animals (>70 hrs) the pattern became somewhat less distinct with more inter-stripe fluorescence (Fig S6.  
266 When we examined orthogonal views of bristle image stacks the stripes of Kkv were obvious (Fig 5N).  
267 Unless stated otherwise, in subsequent in vivo imaging experiments, we primarily examined bristles  
268 from 50-65 hr old animals as these showed the most dramatic “stripe pattern”. Control experiments  
269 with Oregon-R pupae established that the fluorescence we were observing was due to the edited *kkv*  
270 gene and not to autofluorescence (Fig S5C-F).

271 As noted in the introduction the relationship between the patterned deposition of chitin and the  
272 localization of CS in insects is not clear. To investigate this we carried out experiments where we  
273 localized both Kkv::NG and our chitin reporter (Cht-Vis) in bristles in living pupae (Sobala et al., 2015).  
274 The bands of ChtVis differed from those of Kkv::NG by being smooth rather than punctate (Fig 4C-C’').  
275 However, the two patterns were largely co-aligned in stripes along the proximal distal axis of bristles. In  
276 cross section the ChtVis signal was usually exterior to the Kkv-NG signal as expected for chitin being  
277 secreted and CS being a transmembrane protein localized to the apical plasma membrane (Fig 5O). The  
278 stripe of Kkv::NG was often also offset a bit from the ChtVis signal, which could be a consequence of  
279 ChtVis reporting on chitin (an accumulated product) while the Kkv::NG signal represent protein at a  
280 particular instance in time. The different cellular location (plasma membrane vs extracellular) and  
281 geometry likely contributes to this (Fig S7).

282

### 283 **The actin cytoskeleton influences the accumulation of Kkv**

284 In several experiments, we explored the relationship between Kkv::NG accumulation and the large  
285 bundles of cross-linked F-actin found in bristles (Tilney et al., 1995). These experiments were  
286 complicated by the breakdown of the actin bundles, which starts around 43 hr (Guild et al., 2002), and  
287 our inability to reliably immunostain bristles older than about 48 hr awp. In our best experiments we  
288 examined pupae that were 48hr or younger. An additional complication is geometric and due to Kkv  
289 being in the plasma membrane (and the NG in Kkv::NG being extracellular as described below) while the



290 F-actin extends some distance into the cytoplasm (Tilney et al., 1995) (Fig S7). Using an F-actin reporter  
291 (Lifeact-Ruby - (Hatan et al., 2011; Riedl et al., 2008) we observed a close connection between the  
292 localization of Kkv::NG and the large bundles of F-actin in *neur>lifeact-Ruby; kkv::NG* pupae. The results  
293 varied from the two appearing to co-localize to their being slightly offset (Fig 5H-J, H'-J') consistent with  
294 the geometry considerations (Fig S7).

295 The large bundles of highly cross-linked actin filaments support the shape of growing bristles and in their  
296 absence in *sn<sup>3</sup> f<sup>36</sup>* double mutants the resulting bristles are bent, curved, split, shorter and stand more  
297 upright than normal (Guild et al., 2002; Tilney et al., 2004; Tilney et al., 1995). In separate experiments,  
298 we observed an abnormal distribution of chitin and Kkv::NG in living *sn<sup>3</sup> f<sup>36</sup>* double mutants. The robust  
299 parallel array of chitin bands and Kkv::NG stripes were severely disrupted (Fig 5AB). Kkv::NG was  
300 primarily in the plasma membrane and the chitin appeared to be extracellular so the bundles of F-actin  
301 do not appear to be required for the targeting of Kkv to the plasma membrane or for the secretion of  
302 either chitin or the chitin reporter. To determine the relationship between the abnormal stripes of  
303 Kkv::NG and chitin we examined the distribution of both in the same living bristle. We found the linkage  
304 between chitin and Kkv::NG was maintained even in these highly abnormal bristles (Fig 5CDE). We often  
305 observed stripes of Kkv::NG on both sides of a band of chitin. We have seen this in normal bristles but  
306 by casual observation less frequently.

307

### 308 **Proteins required for the proper localization of Kkv.**

309 We previously established that Rab11 and exocyst function is required for the deposition of cuticle and  
310 the bands of chitin in bristles (Nagaraj and Adler, 2012). Affected bristles become unstable and collapse  
311 after the highly cross linked F-actin bundles in developing bristles begin to depolymerize (Guild et al.,  
312 2002; Nagaraj and Adler, 2012). To determine if the failure to form chitin bands was associated with a  
313 failure to properly localize CS we examined Kkv::NG in thoracic bristles of living *neur-Gal4 Gal80-*  
314 *ts/Rab11 RNAi; kkv-NG/kkv-NG* pupae that were shifted to 29.5°C at wpp (white prepupae). When  
315 allowed to develop to adulthood these animals showed the extreme stub macrocheatae phenotype  
316 described previously (Nagaraj and Adler, 2012). The morphology of the bristles was dependent on pupal  
317 age. In the youngest animals examined, the bristles were beginning to show the blebbing characteristic  
318 of the early stages of the collapse program (Nagaraj and Adler, 2012). In older animals the collapsed  
319 stub bristle morphology was seen (Fig 5G, arrow). The stripes of Kkv::NG were lost and in Z sections we  
320 found that the protein was not preferentially localized to the plasma membrane and instead was found  
321 in the cytoplasm (Fig 5P). These observations indicate that Rab11 function is required for the proper  
322 trafficking of Kkv to the plasma membrane and this can explain the loss of chitin bands in the Rab11  
323 mutant (Nagaraj and Adler, 2012).

324 The Zona Pellucida domain containing Dusky-Like (Dyl) protein acts as a Rab-11 effector for chitin  
325 deposition in bristles (Nagaraj and Adler, 2012). To determine if Dyl was required for the proper  
326 localization of Kkv we examined Kkv::NG in thoracic bristles of living *UAS-dyl-RNAi/+; neur-Gal4*  
327 *kkv::NG/kkv::Ng* pupae where Dyl expression was knocked down. The bristle collapse phenotype seen

328 in these bristles is similar that of the Rab11 knock down; albeit slightly weaker as not all macrocheatae  
329 show the extreme stub phenotype. We observed these bristles in the blebbing stage and observed the  
330 loss of the robust striping pattern of Kkv::NG accumulation (Fig 5F). Kkv::NG in such bristles was  
331 primarily seen spread around the plasma membrane (Fig 5Q). The distribution was not uniform but was  
332 far from the nicely spaced stripes seen in wild type. The data argue that Dyl is required for the  
333 localization of Kkv::NG in stripes but not for its insertion into the plasma membrane. The difference in  
334 Kkv::NG localization between the Rab11 and Dyl knockdowns suggests that these two genes and  
335 proteins mediate different steps in the localization of Kkv.

336 To complement these experiments we also simultaneously localized Kkv-NG and Dyl in bristles by  
337 immunostaining. The stripes of Kkv::NG and Dyl were interdigitated but did not appear to touch (Fig  
338 5KLM). As described above and elsewhere (Nagaraj and Adler, 2012) the function of the actin  
339 cytoskeleton, Rab11 and *dyl* are required for the normal accumulation of both chitin and Kkv::NG in  
340 developing bristles. To determine if the function of the actin cytoskeleton is required for the normal  
341 subcellular localization of Dyl in stripes we immunolocalized Dyl in developing *sn<sup>3</sup> f<sup>36</sup>* bristles. We found  
342 that the normal striped accumulation of Dyl was disrupted in the *sn<sup>3</sup> f<sup>36</sup>* bristles (Fig S8AB ).

343

#### 344 **Localization of an inactive mutant Kkv**

345 We next addressed the question of whether the catalytic activity of Kkv might impact its subcellular  
346 localization by placing a R896K mutation put into *UAS-kkv::NG*. This missense mutation is the cause of  
347 the amorphic *kkv<sup>1</sup>* allele and is in an invariant site that is part of the enzyme's active site (Dorfmueller et  
348 al., 2014; Merzendorfer, 2006; Moussian et al., 2005; Nagahashi et al., 1995). We first tested if this  
349 transgene could rescue the wing hair phenotype seen in *kkv::smFP* flies. The wings of *ap-Gal4/+; UAS-*  
350 *kkv-R896K::NG kkv::smFP/kkv::smFP* flies showed no evidence of rescue of the *kkv::smFP* hair  
351 phenotype (Fig 2IJ). The failure of this transgene, which encodes a protein that very likely has little or no  
352 catalytic activity, provides support for the validity of the *kkv::smFP* rescue assay.

353 When expressed by *ptc-Gal4* Kkv::NG preferentially localizes to the apical surface of salivary gland cells  
354 (Fig S4I), while in comparison Kkv R896K::NG was distributed relatively evenly in the cytoplasm (Fig S4J).  
355 At higher magnification we observed Kkv::NG accumulated in what appear to be vesicles (Fig S4I') (The  
356 salivary gland cells are packed full of vesicles at this stage). In addition to outline fluorescence we  
357 observed puncta of Neon Green fluorescence on the vesicles (Fig S4I', arrow). The mutant protein  
358 accumulation appeared different with accumulation either between vesicles or in abnormally shaped  
359 vesicles (Fig S4 J'). As noted earlier, Kkv::NG accumulates in wing hairs (Fig 3C-L, S4A) the most apical  
360 part of wing epidermal cells. In contrast, Kkv R896K::NG did not accumulate in the hair. Rather, it  
361 accumulated relatively evenly in the cytoplasm (it appears to be restricted from the nucleus) (Fig S4B).  
362 This was not due to delayed hair development as when we stained for F-actin using phalloidin we  
363 observed the expected hairs with Kkv R896K::NG in the cytoplasm (Fig 4PQR, Fig S4CD). In developing  
364 bristles Kkv R896K::NG did not routinely accumulate in proximal/distal stripes as the wild type protein  
365 does. Rather, much of the protein was not found on the plasma membrane and there were uneven

366 regions with varying levels of fluorescence (Fig S4E-H). One possibility for the mislocalization is that the  
367 mutant protein might be cleaved so that NG was no longer a valid reporter for the enzyme. To test this  
368 we immunostained both pupal wings and bristles using both the anti-NG and anti-Kkv-M antibodies.  
369 Extensive co-localization of the two staining signals indicated that the NG tag remained a valid reporter  
370 for the R896K mutant (Fig 4JKL, PQR).

371

### 372 **A Kkv with a catalytic domain mutated to a mosquito catalytic domain is functional.**

373 We next attempted a more ambitious test of the *kkv-smFP* rescue assay using a UAS transgene where  
374 the con1 domain of *kkv* was replaced by the equivalent region of a mosquito chitin synthase (*UAS-kkv-*  
375 *mos::NG* – see Fig 1B and Methods for details). We generated *ap-GaL4/+; UAS-kkv-mos::NG*  
376 *kkv::smFP/kkv::smFP* flies and found that the mutant wing hair phenotype of *kkv::smFP* to be fully  
377 rescued in the dorsal but not ventral wing surface hairs (Fig 2KL) indicating that this “hybrid” protein is  
378 active.

379

### 380 **Topology of Kkv**

381 Different programs that predict transmembrane domains give different predictions for the topology of  
382 Kkv (see Methods for more information). The predictions differ in terms of the number of  
383 transmembrane domains and in the predicted location (cytoplasmic vs extracellular) of different protein  
384 regions. For example, the TMPRED program predicts 18 transmembrane domains (TMDs) while  
385 TMHMM2.0 predicts 15 TMDs. Among 14 different predictions a set of 14 putative TMDs were included  
386 in 13 or 14 predictions. Fig 6B shows the locations of these “consensus predictions”. The reagents we  
387 generated for other reasons provided us with tools we could use to probe the topology of Kkv. We  
388 immunostained *ptc>kkv-OH* (and *ptc>kkv-NG*) wing discs either with or without permeabilization of the  
389 plasma membrane with Triton X-100 (Fig 6A). We found both anti-NG and anti-Ollas antibodies stained  
390 wing discs in the absence of permeabilization indicating that the C terminus is exposed to the  
391 extracellular space (Fig 6A). All of the topology programs predicted this. In contrast when we used an  
392 anti-Kkv polyclonal antibody (anti-Kkv-M) raised against aa 1097-1246 we did not see any staining in the  
393 absence of Triton X-100 permeabilization (Fig 6A), arguing this region is intracellular. This disagrees with  
394 the consensus prediction. Similar results were obtained when we used antibodies directed against aa  
395 53-66 and also antibodies directed against aa 530-541 – a region located not far from the catalytic  
396 domain (Fig 6AB). These results indicate that these regions of Kkv are also located in the cytoplasm. It is  
397 worth noting that no programs predicted a transmembrane domain in the region encompassing aa 1-53,  
398 which when combined with our data suggests that the amino terminus of Kkv is located in the  
399 cytoplasm. None of the programs predicted a transmembrane domain between the aa 530 and the  
400 catalytic domain suggesting this region is part of the same cytoplasmic loop. Our experimental data  
401 does not agree with the consensus TMD predictions as they suggest that the region between 1097-1246  
402 is extracellular but an antibody directed against this region was unable to stain the protein in the

403 absence of Triton X-100 treatment. No differences were seen when we ran several of the computer  
404 analyses with the alternative Kkv isoform.

405

#### 406 **Kkv is shed**

407 In experiments where we imaged Kkv::NG in living pupae we noticed fluorescent puncta in the  
408 extracellular space between the pupal cuticle and the epidermal cells that were in the process of  
409 synthesizing the adult cuticle (Fig 4B, S3A, Fig S9A). To investigate this in more detail we obtained large  
410 Z stacks that extended from the pupal cuticle to below the apical surface of the epidermal cells. Pupal  
411 cuticle in 50 hr pupae shows substantial autofluorescence so we examined and compared *Ore-R* and  
412 *kkv::NG* pupae to determine what if any fluorescence was due to the presence of the Kkv-NG protein.  
413 The autofluorescence of the thoracic pupal cuticle of *Ore-R* was spatially relatively even (Fig 7D). In  
414 contrast, the fluorescence of pupal cuticle of *kkv-NG* flies was much more uneven with both puncta  
415 (arrow) and lines (arrowhead) of bright fluorescence (Fig 7A). No fluorescence was observed in the  
416 region between the pupal cuticle and the apical surface of the epithelial cells in *Ore-R* pupae (Fig 7E). In  
417 contrast, in this region many fluorescent puncta were observed in *kkv::NG* pupae (Fig 7BC)(arrow). A  
418 majority of these were located close to the pupal cuticle but some were observed throughout the  
419 region. Most of the *puncta located close to the pupal cuticle* were stable but many of those located  
420 lower were mobile (movie S1). Since the fluorescent puncta were only seen when the *kkv::NG* gene  
421 was present we interpret the puncta as evidence of shed Kkv::NG. Since the puncta were located above  
422 the impermeable adult cuticle (which is in the process of being synthesized), it seems likely that the  
423 Kkv::NG was shed during or after the synthesis of the pupal cuticle and before the synthesis of the adult  
424 cuticle began. Consistent with this hypothesis we observed puncta in 28hr pupae, well before the start  
425 of adult cuticle deposition (Sobala and Adler, 2016). We also observed puncta in very young pupae (20  
426 hr awp) prior to the detachment of the epithelial cells from the pupal cuticle (Fig. S9B). We observed  
427 similar puncta when we examined *ap>kkv::NG* pupae (Fig S9C) but not from *ap>kkv-R896K::NG* pupae  
428 (Fig S9D), arguing that to be shed Kkv needs to be localized apically.

429 The highest concentration of puncta were over the dorsal thoracic midline (Fig S9AB). There were also a  
430 large number of puncta over the dorsal abdomen and they were seen at a lower frequency in the wing,  
431 legs and head. In the abdomen the puncta tended to align parallel to the segment boundary (Fig S3A  
432 arrows).

433 All of the experiments where we detected puncta in living pupae required imaging of the Kkv::NG fusion  
434 protein. Experiments described earlier established that NG was a valid reporter for Kkv in bristles so it  
435 seemed likely that it was also a valid reporter for Kkv in puncta. In an attempt to test if this was correct  
436 we immunostained pupal cuticle using both anti-NG and anti-Kkv-M antibodies. Among the puncta  
437 detected 69.7% stained with both antibodies indicating most puncta contained both NG and Kkv (Fig  
438 S10, arrows).

439 The shedding of Kkv::NG could be specific for Kkv or it could reflect a process that leads to the shedding  
440 of many if not all of the proteins located in the apical plasma membrane. To distinguish between these

441 possibilities we examined live *ap-Gal4/+; UAS-mCD8-GFP/+* pupae. These animals showed a large  
442 number of fluorescent puncta present in the space between the pupal cuticle and the apical surface of  
443 the epithelial cells (Fig 7GHI). As was the case for the puncta in *kkv::NG* pupae many of the puncta were  
444 mobile (movie S2). We conclude that the shedding of membrane proteins is not specific for Kkv or  
445 proteins involved in cuticle deposition.

446

447

#### 448 **Cell autonomy of *kkv***

449 We previously observed clones of *kkv* in the wing where they lead to faint and flaccid wing hairs (Ren et  
450 al., 2005). By examining the morphology of the hairs, the clones appeared to be completely cell  
451 autonomous. However, in adult wings the hair is located over the center of the cell and it is not clear if  
452 we could detect limited partial cell non-autonomy in such an assay. Given the close juxtaposition of the  
453 epidermal cells and the cuticle during cuticle deposition it seems unlikely that CS containing vesicles, if  
454 they exist, could diffuse far. To determine if we could detect any evidence of non-autonomy for *kkv* we  
455 needed an assay that allowed us to identify *kkv* clones and examine them at a higher resolution than is  
456 possible in the light microscope. We found that we could fracture adult cuticle and by scanning  
457 electron microscopy (SEM) detect a layered structure. The layers were very distinctive in abdominal  
458 cuticle (Fig S2G) consistent with the robust layering in abdominal procuticle seen by TEM (Fig S2H). We  
459 also examined wings attached to studs in a vertical position, fractured and imaged by SEM. In wing  
460 cuticle we could also detect a layered structure that presumably reflects the banding of chitin in the  
461 procuticle (Fig 8C). The layering was less distinctive than in the abdominal cuticle, which we also found  
462 to be true by TEM (Sobala and Adler, 2016). We next fractured and observed wings carrying *kkv* loss of  
463 function clones. We were able to identify mutant clones by the presence of the *kkv* flaccid hair  
464 phenotype (Fig 8BDE, arrows) (Ren et al., 2005). If there was complete cell autonomy we predicted a  
465 sharp change in wing cuticle thickness at wt-mutant clone boundaries (Fig 8A). In contrast, if there was  
466 a small degree of cell non-autonomy we predicted that we would see a smooth change in cuticle  
467 thickness near the edge of clones (Fig 8A). In all of the clones (n=9) we examined there was a smooth  
468 transition in cuticle thickness (Fig 8DE). This transition zone appeared to be restricted to a mutant cell  
469 and its direct neighbor.

470

471

#### 472 **Discussion:**

#### 473 **The patterning of Chitin deposition is linked to the localization of Kkv**

474 Our observations generally support a model where the localization of chitin deposition is closely linked  
475 to the localization of Kkv (Chitin synthase). The most compelling data being that the localization of  
476 chitin and Kkv remain linked even when the distribution of both is abnormal. A limitation of our

477 observations is that they focused on the bands of chitin seen along the proximal distal axis of developing  
478 sensory bristles. The cuticle that covers the sensory bristles differs in two ways from the cuticle that  
479 covers much of the fly's body. First, we have not detected the layering of chitin in TEM studies of  
480 bristles although this could simply be due to a higher concentration other components in the procuticle  
481 interfering with our ability to detect the layering. A second difference is that the prominent undulae  
482 seen in most cells synthesizing cuticle were not detected in bristle forming cells (Adler, 2017). Further  
483 studies will be needed to determine if the close connection between chitin and chitin synthase is a  
484 general result for arthropod epithelial cells, but that seems likely. The close connection between CS and  
485 chitin is similar to that seen in yeast and fungi (Leal-Morales et al., 1994) (Chuang and Schekman, 1996)  
486 (Santos and Snyder, 1997) (Kozubowski et al., 2003) (Latge et al., 2005) and is reminiscent of the  
487 connection between cellulose and cellulose synthase in plants (Polko and Kieber, 2019).

488  
489 Our SEM analysis of *kkv* mutant clones showed that there was a gradual thinning of the procuticle in the  
490 region where mutant and wild type cells were juxtaposed. That result and our other results showing Kkv  
491 and chitin are closely localized to one another is compatible with models where at least some localized  
492 Kkv becomes incorporated into secreted vesicles, which have some but limited ability to move in the  
493 extracellular space between cuticle and the apical plasma membrane. It is also compatible with models  
494 where localized Kkv secretes chitin fibers that can bind a carrier protein to form a complex that has a  
495 limited ability to move prior to deposition. It does not fit well with models where localized Kkv always  
496 leads to chitin fiber deposition close to the site of synthesis. An alternative possibility is that the SEM  
497 assay is misleading. For example, the gradual change in cuticle thickness detected by SEM might not be  
498 directly related to a different amount of chitin fibrils, but rather mechanical forces that are part of wing  
499 maturation lead to a smooth transition between the cuticle above neighboring mutant and wild type  
500 cells independent of chitin content.

501  
502 The localization of Kkv in bristles requires both the intracellular transport of the protein into the plasma  
503 membrane and its restriction to stripes. In principle, one or two (or more) genetic pathways could  
504 mediate these steps. We previously identified the *Rab11* and *dyl* as being essential for the normal  
505 deposition of chitin in bands in bristles (Nagaraj and Adler, 2012). We found here that in the absence of  
506 *Rab11* function Kkv::NG failed to localize to the plasma membrane. In contrast, in the absence of *dyl*  
507 function Kkv::NG localized to the plasma membrane but it did not preferentially accumulate into the  
508 appropriate stripes. These results argue that there are at least two separate genetic  
509 pathways/functional systems that are essential for the localization of Chitin Synthase in insects. *Rab11*  
510 is also required for the insertion of Dyl into the plasma membrane of developing bristles (Nagaraj and  
511 Adler, 2012) and we suspect it has a general role in either the intracellular transport of membrane  
512 proteins from the cell body to the shaft of the bristle and/or for insertion of proteins into the shaft  
513 plasma membrane. The role of *dyl* is of particular interest. Dyl is a ZP (zona pellucida) domain protein  
514 and like other ZP domain proteins it can polymerize (Jovine et al., 2005; Adler et al., 2013; Jovine et al.,  
515 2002) and it is thought that through this it can organize the apical extracellular matrix (Chanut-  
516 Delalande et al., 2012; Fernandes et al., 2010). The expression of *dyl* is almost entirely restricted to the  
517 period of envelop deposition (Sobala and Adler, 2016) and it accumulates in bands along the proximal  
518 distal axis of developing bristles (Nagaraj and Adler, 2012). Hence, it localizes in a way that is

519 appropriate for instructing the later accumulation of Kkv in stripes. We observed that the stripes of  
520 Kkv::NG and Dyl were interdigitated and did not overlap. I suggest that that Dyl functions as a negative  
521 factor to prevent the accumulation of Kkv::NG from regions of the bristle plasma membrane, but likely  
522 does so indirectly as there appears to be space between the interdigitated bands. Future studies will be  
523 needed to elucidate the mechanisms involved here (e.g. local Dyl could recruit a factor that removes  
524 Kkv::NG from nearby regions of the membrane). In addition to Rab11 and Dyl we also established that  
525 the large bundles of cross linked F-actin in bristles were also required for the normal deposition of chitin  
526 bands. The localization of both Dyl and Kkv::NG were altered in developing *snf* bristles. The  
527 mislocalization of Dyl provides a mechanism for the mislocalization of Kkv::NG and the subsequent  
528 abnormal chitin deposition in these bristles. A number of other genes have been identified that are  
529 required for normal chitin deposition or where a loss of function leads to a *kkv* like wing hair phenotype  
530 (Adler et al., 2013; Chaudhari et al., 2011; Moussian et al., 2015; Moussian et al., 2006b). It will be  
531 interesting to determine if any of these also mediate Kkv localization.

532

533 It is possible that Kkv is actively cycled from the plasma membrane to cytoplasmic  
534 endosomes/chitosomes and then back to the plasma membrane. There is strong evidence for the  
535 recycling of chitin synthase in yeast (Hernandez-Gonzalez et al., 2018; Knafler et al., 2019; Sacristan et al.,  
536 2013) and Rab11 is a well-established marker for late endosomes (Calero-Cuenca and Sotillos, 2018)  
537 (Welz et al., 2014) and the recycling of membrane proteins. In such a model the failure of Kkv::NG  
538 localization in Rab11 deficient bristles could be due to a defect in recycling and not in the original  
539 localization. This might also explain the failure of the presumptive catalytic defective Kkv-R896K mutant  
540 protein to localize to the plasma membrane. It is possible that the inactive protein is more rapidly  
541 removed from the membrane and that it is preferentially not recycled back to the plasma membrane or  
542 recycled more slowly. This could be a quality control mechanism in the formation of insect cuticle.

543

#### 544 ***kkv::smGFP* is useful as a system for structure function studies on CS.**

545 The importance of chitin synthase function for insects is demonstrated by the lethality associated even  
546 with relatively small clones of *kkv* mutant cells (Ren et al., 2005) (Adler et al., 2013) and knocking down  
547 *kkv* function for a restricted period of time in a limited set of epidermal cells (*pna* - unpublished). The  
548 edited *kkv::smFP* allele is the only homozygous viable hypomorphic allele of *kkv* that we are aware of. As  
549 we demonstrated the rescue of the wing hair phenotype of *kkv::smFP* is an easy assay for testing the  
550 functionality of mutant Kkv proteins. This assay relies on UAS-Gal4 driven expression and this could be  
551 misleading as overexpression could prevent distinguishing between mutants with reduced vs completely  
552 normal activity. There are however, advantages to this assay compared to editing the endogenous  
553 gene. It is important to consider that while CRISPR/Cas9 mediated editing is not difficult it still involves  
554 more time and labor than UAS transgenesis and mutations identified as interesting by the UAS-Gal4  
555 system can later be assessed using CRISPR/Cas9 to test for reduced but still significant chitin synthase  
556 activity. Further, chitin synthases are known to function as multimers (Merzendorfer, 2011) (Gohlke et  
557 al., 2017) and some mutations might be dominant negatives. These could be identified using the UAS-

558 Gal4 system but they would likely fail to be recovered by CRISPR/CAS9 mediated editing (or by classical  
559 mutagenesis) as they are likely to be dominant lethals. The UAS/Gal4 system could also be used to  
560 identify parts of the Kkv protein that are essential for its localization. The rescue by the Kkv-mos::NG  
561 protein shows the ability of this system to establish that a “mutant” Kkv can retain activity.

562 It was not surprising that the *kkv R896K* mutant showed no rescue activity as this missense mutation is  
563 considered an amorphic allele in *Drosophila* (Moussian et al., 2005) and a similar substitution in yeast  
564 contained only about 1% of wild type activity (Nagahashi et al., 1995). The failure of Kkv R896K to show  
565 rescue activity validates this system for structure function studies on the fly CS. It was surprising that  
566 this mutant protein did not localize properly. It is possible that the active site missense mutation  
567 disrupts both catalytic activity and normal protein folding and the folding defect leads to a failure to  
568 traffic the protein to the apical plasma membrane. As noted above it is also possible that the defect is  
569 not in the initial trafficking but is due to the inactive protein being recycled more quickly. Further  
570 studies will be required to distinguish between these hypotheses.

571 The *kkv::NG* and *kkv-smFP* edits were in the same location in the genome so it is likely that the greater  
572 activity and fluorescence of the *kkv::NG* edit compared to the *kkv-smFP* edit is not due to differences in  
573 transcription. Rather, our data suggests the smFP tagged only accumulates to a much lower level than  
574 the NG tagged protein. This could be due to a reduced half-life of the smFP tagged protein or to it  
575 folding less efficiently. One possible cause of this is the presence of multiple copies of the HA epitope  
576 tag in smFP. A study in yeast reported that a 3XHA tag could cause a dramatic decrease in the  
577 accumulation of some of the tagged proteins (Saiz-Baggetto et al., 2017). It is possible that a similar  
578 phenomenon can explain our results with *kkv-smFP*.

579

## 580 **Significance of Kkv shedding?**

581 The shedding of membrane proteins is not a rare phenomenon (e.g.(Lichtenthaler et al., 2018; van Niel  
582 et al., 2018)). In most cases the shed material is an ectodomain that is released due to proteolysis  
583 (Lichtenthaler et al., 2018). Such a shedding mechanism could explain the shedding of the NeonGreen  
584 component; however, it cannot explain our observation that most puncta stained with both an anti-NG  
585 antibody and an antibody directed against an internal and cytoplasmic region of Kkv. Hence, we suggest  
586 that the principle mechanism leading to the shed material is the shedding of a vesicle that contains  
587 much if not all of Kkv::NG (van Niel et al., 2018).

588 Our in vivo imaging of Kkv::NG provided evidence that Kkv::NG shedding occurs during or after the  
589 synthesis of the pupal cuticle. Our ability to detect the shedding was facilitated by the release of the  
590 pupal cuticle from the epidermal cells that secrete it. This does not happen with the synthesis of the  
591 adult (or larval cuticle) so we were not able to determine if Kkv::NG shedding also happens during the  
592 synthesis of the adult cuticle. It is unclear if the shedding is directly related to chitin synthase function  
593 (e.g. secreted chitosomes) or if it a consequence of a process that is not directly related to chitin  
594 deposition. We did not see evidence of shed puncta when Kkv R896K::NG was expressed in wing cells  
595 but that could simply be due to the protein not being localized to the apical surface and unrelated to it



596 being catalytically inactive. Our finding that mCD8-GFP is also shed suggests shedding is a general  
597 property of membrane proteins either during or after pupal cuticle deposition is complete. It is unclear  
598 what if any functional significance is connected to the shedding.

599

#### 600 **Kkv is present in the plasma membrane prior to procuticle formation.**

601 Previous studies on the transcriptome of pupal wing cells (Ren et al., 2005; Sobala and Adler, 2016)  
602 established that *kkv* RNA was present prior to the start of wing blade procuticle deposition. Part of the  
603 reason for this is that wing hair chitin is deposited earlier than wing blade chitin. However, this cannot  
604 explain the presence of *kkv* RNA 8 hrs prior to the start of hair morphogenesis and 16 hrs prior to the  
605 earliest time we can detect hair chitin (Ren et al., 2005) nor the presence of Kkv protein in the general  
606 apical membrane (i.e. not in the hair) more than 12 hrs prior to blade procuticle deposition. These  
607 observations suggest the possibility that Kkv has an earlier function in cuticle formation that is not due  
608 directly to chitin synthesis (e.g. a structural role for the protein) or that the synthesis of unstable chitin  
609 could be important prior to the time when it begins to accumulate. Both of these hypotheses suggest it  
610 might be possible to detect abnormalities at early stages of cuticle formation in *kkv* mutant cells. It is  
611 worth noting that previously we detected several patches of extracellular chitin fibers on the apical  
612 surface of 29 hr awp pupal wings (Sobala et al., 2015). This is 11 hrs prior to when we first detect chitin  
613 in hairs (Adler et al., 2013) and 3 hours prior to the start of hair outgrowth (Wong and Adler, 1993).

#### 614 **Similarities and differences in bristle and tracheal chitin deposition.**

615 Chitin deposition in bristles and the adult cuticle shows both similarities and differences from that  
616 described in trachea. In trachea the distribution of chitin changes during development. Starting out as a  
617 thick filament that largely fills the lumen it transforms into a thin zig zag shaped filament. The thin  
618 filament is eventually lost and during this period chitin becomes concentrated over the distinctive  
619 tracheal taenidial folds (Devine et al., 2005; Ozturk-Colak et al., 2016; Tønning et al., 2005). It is not  
620 clear whether there is a complete loss of the chitin fibrils found in the central filament or if there is a  
621 reorganization of those fibrils into the taenidial fold chitin. In both tissues the disruption of the actin  
622 cytoskeleton results in an abnormal pattern of chitin; however in tracheal development a lack of chitin  
623 lead to an abnormal actin cytoskeleton while we did not see that in wing cells that lacked Kkv (Adler et  
624 al., 2013). In trachea Kkv puncta were seen more frequently over the taenidial folds than in the inter-  
625 fold region (Ozturk-Colak et al., 2016) but the patterning was much less distinctive than we have seen in  
626 bristles. Some of the differences between these results could be due to the use of UAS-Gal4 to drive the  
627 expression of Kkv in trachea as in our hands using this system resulted in a “messier” pattern than was  
628 observed using the edited *kkv* gene. This is presumably due to UAS-Gal4 leading to overexpression.

629

630

#### 631 **Methods and Materials**

## 632 Fly Stocks and Genetics

633 Flies were grown on standard fly food. They were routinely raised at 25°C, but in some experiments,  
634 they were raised at 21°C to slow development. In other experiments we used a temperature sensitive  
635 Gal80 to limit UAS transgene expression (McGuire et al., 2004). In these experiments, the animals were  
636 grown at 21 °C or 18 °C and then at the desired stage transferred to 29.5°C to inactivate the Gal80 and  
637 induce the expression of the UAS transgene. The various RNAi inducing transgenes came either from the  
638 VDRC (Dietzl et al., 2007) or TRiP collections (Perkins et al., 2015). The VDRC lines were obtained from  
639 the VDRC (<http://stockcenter.vdrc.at/control/main>). The TRiP lines were obtained from the  
640 Bloomington Drosophila Stock Center (<http://flystocks.bio.indiana.edu/>) (NIH P40OD018537) as were  
641 many other lines used in the research (e.g. Gal4 lines, Df stocks, *kkv*<sup>1</sup> carrying stock). Flies that carried a  
642 *y w sn<sup>3</sup> f<sup>360</sup>* X chromosome were kindly provided by G. Guild. Other stocks were made by the author in  
643 his lab.

## 644 Constructs for generating transgenic lines.

### 645 UAS constructs

646 The UAS constructs were in the pUAS-attb vector (Bischof et al., 2007). There are 3 *kkv* mRNA isoforms  
647 that encode two distinct *kkv* proteins (Thurmond et al., 2018). All of our experiments and analyses were  
648 done with the A isoform unless stated otherwise. The C protein isoform is identical to the A isoform and  
649 both contain 1615 aa. The D isoform also contains 1615 aa but it differs from the other two proteins by  
650 14 aa due to its mRNA containing an alternative coding exon. The 14 amino acids are found in the  
651 region bounded by aa 1277 and 1322 of the A isoform. A comparison of the sequence of the genomic  
652 *kkv* gene and the longest *kkv* cDNA (RE32455) from the Drosophila genome project revealed two  
653 putative single base pair deletions in RE32455. A comparison of conceptual translation with those of  
654 other chitin synthases showed that the genomic sequence was correct. The two single base pair  
655 deletions were repaired by site directed mutagenesis to correspond to the genomic sequence. The  
656 cDNA was amplified and fused to the coding region for Neon Green by Gibson assembly (NEB-E2611).  
657 This fusion gene was inserted into pUAS-attb using added Xho1 and Xba1 sites present in pUAS-attb  
658 and added to *kkv::NG* during construction using PCR and oligos containing the sites. This plasmid is  
659 referred to as *UAS-kkv::NG*. A similar strategy was used for the construct where the Neon Green tag  
660 was replaced by the ollas-his<sub>6</sub> (OH) tag. The nucleic acid sequences are provided in supplementary files  
661 S1 and S2 and the sequences of the tagged Kkv proteins are provided in files S3 and S4. *The UAS-kkv-*  
662 *R896K::NG* plasmid used for transgenesis was made by site directed mutagenesis of *UAS-kkv::NG*.  
663 Although an R to K substitution is generally considered a conservative substitution R896 is conserved in  
664 all chitin synthases and is thought to be at the catalytic site. In addition, the R to K change is found in  
665 the amorphic *kkv*<sup>1</sup> mutation in Drosophila (Moussian et al., 2005). The same R to K mutation in yeast  
666 Chs2 resulted in a reduction to ~ 1% of normal Chs2 enzyme activity (Nagahashi et al., 1995). The Kkv-  
667 mos::NG protein differs from Kkv::NG by a series of mutations that lead to 8 amino acid changes (in the  
668 CS-C domain (pfam 03142)) that are found in several mosquito species (e.g Aedes aegypti, Aedes  
669 albopictus, Anopheles gambiae str. PEST, Culex pipiens pallens, Anopheles quadrimaculatus, Anopheles  
670 sinensis) . In Kkv-mos::NG the sequence from aa 702-909 is identical to the mosquito Chitin Synthase 1

671 proteins. The CS-C domain is from aa 722 to aa 904 in *kkv* and is slightly larger than a region of ScCHS2  
672 that was shown to contain chitin synthase catalytic activity (ref). The *UAS-kkv-mos-NG* plasmid was  
673 constructed from *UAS-kkv::NG* by synthesis of the relevant region and by it being placed into *kkv-NG* by  
674 Gibson assembly (this and several other DNA manipulations were done by EpochLifeSciences). The  
675 nucleic acid sequence of *kkv-mos::NG* is provided in sequence file S5 and the protein sequence in S6.

## 676 **The HDR repair constructs**

677 The upstream, middle and downstream repair regions were synthesized by assembly of oligonucleotides  
678 by EpochLifeSciences. The segments that comprised Neon Green and smGFP-HA were obtained by PCR  
679 from plasmids obtained from Allelebiotech and Addgene (#63166) respectively, added in the correct  
680 position by Gibson Assembly. The synthesized segment included several silent mutations to prevent re-  
681 cutting by Crispr/Cas9. The repair segments were subcloned into pHD-DsRed vector (Addgene plasmid  
682 #51434). The sequences of the plasmids that contain the HDR repair constructs are provided in files S7  
683 and S8. The sequences of the Kkv proteins encoded by the two edited genes are provided in File S9 and  
684 S10. The construction of the edited genes resulted in a two amino acid linker (AG) between the C  
685 terminal aa of *kkv* and the first amino acid of NG (or smFP). A carton showing the strategy is provided in  
686 Fig 1.

687 **gRNA constructs:** Two plasmids that express the needed gRNAs were made by inserting  
688 oligonucleotides (files S11) into the pCFD3-cU6:gRNA plasmid where they would be expressed from the  
689 pU6-3 promoter (Addgene plasmid #45946).

690 **Transgenic Lines:** Injections of DNA into embryos were done by Rainbow Transgenics. The UAS  
691 transgenes were injected into embryos that contained the VK00033 attp landing site (cytol location  
692 65B2; 3L:6,442,676..6,442,676). The transgenes were marked by a *w<sup>+</sup>* gene and Go flies were crossed  
693 to *w<sup>1118</sup>*; TM3/TM2 flies and the progeny screened for eye color. G1 male flies with eye color were  
694 crossed to *w*; TM3/TM6 female flies and stocks were established by crossing siblings.

695 The HDR construct and the gRNA constructs were both injected into *nos-Cas9* expressing embryos  
696 (injections by RainbowTransgenics). The Go flies were crossed to *w*; TM3/TM2 flies and the G1 flies  
697 were screened for candidate edits by the expression of DsRed. Numerous putative edits were obtained  
698 by screening for RFP expression from the Phd-Ds-red vector used for HDR. Putative edit containing flies  
699 were crossed to *w*; TM2/TM3 flies and stocks established by crossing siblings that contained the TM3  
700 balancer. The Ds-Red expression was monitored and proved to be useful in later stock constructions.  
701 We also generated fly stocks where the DsRed was removed by crossing edited male flies to *hs-cre*;  
702 *TM3/TM2* females and then crossing *hs-cre*; *kkv::NG + DS-Red/TM3* males to *w*; *TM3/TM2* females. The  
703 progeny from this cross were screened for *TM3* (and non-*TM2*) flies that did not express Ds-Red. Stocks  
704 were established from such single male flies and characterized by PCR to insure they carried the edited  
705 *Kkv-NG* gene but lacked Ds-red sequences. No phenotypic differences were observed between edited  
706 flies that carried or did not carry Ds-Red. The presence of Ds-Red expression was convenient for  
707 following the edited gene in crosses and it was used for some experiments where we were not imaging  
708 an alternative red fluorescent protein or stain.

709 **Characterization of *kkv* edits.** Six independent lines were established for both types of edits. DNA was  
710 isolated from these and assayed for the correct DNA changes by PCR followed by sequencing (the oligos  
711 used for these experiments are in Table S1). Most of the lines appeared to be as designed and resulted  
712 in the in frame fusion of the C terminus of Kkv and the fluorescent protein with the designed two amino  
713 acid linker. Three *kkv-NG* and two *kkv-smGFP-HA* lines were retained and further characterized. No  
714 differences were seen between the 3 NG edits and between the 2 smGFP edits. One line of each was  
715 chosen as the standard for routine use.

## 716 **Confocal Microscopy**

717 Immunostaining of fixed pupal epidermal cells during the deposition of cuticle is complicated by the  
718 inability of the antibodies to penetrate cuticle after the early stages of its development. Thus, most of  
719 the imaging experiments we carried out on Kkv in pupae were done by in vivo imaging of Kkv::NG. In a  
720 small number of experiments we examined Kkv-NG in fixed tissue. In some we simply used the inherent  
721 fluorescence of the neon green tag (sometimes combined with phalloidin staining of actin). In others we  
722 used anti-NG immunostaining. Such tissue was only weakly fixed and we did not use animals that were  
723 older than around 48 hr after white prepupae (awp). Otherwise, immunostaining of pupal and larval  
724 tissues were done as described previously (Nagaraj and Adler, 2012). Imaging of live Kkv::NG containing  
725 pupae was done on a Zeiss 780 confocal microscope in the Keck Center for Cellular Imaging. Stained  
726 samples were examined on the same microscope.

727

## 728 **Comparison of *kkv::NG* and *kkv::smFP***

729 We estimated the brightness difference between the products of the *kkv::NG* and *kkv::smFP* edited  
730 genes by live imaging both in the same confocal session using the same microscope conditions. We  
731 measured the brightness of maximal projections of both types of animals and then subtracted the  
732 background brightness. The ratio of brightness for *kkv::NG* and *kkv::smFP* was 14.7. To estimate the  
733 relative amount of the two proteins present we needed to correct for the relative brightness of the two  
734 fluorescent protein tags. We were unable to find a value for the brightness of *smFP* but we were able to  
735 find a value for the progenitor of smFP, superfolder GFP and Neon-Green (Lambert and Thorn, 2019).  
736 The relative brightness was 1.7, which gave an estimate that Kkv::NG was present in 8.65 fold higher  
737 concentration than Kkv::smFP. Assuming Kkv::smFP has the same specific activity as wild type Kkv we  
738 estimate the *kkv::smFP* cells only contain about 11% of the normal Kkv enzyme activity.

739

## 740 **Kkv topology experiments**

741 We obtained predictions for the number and locations of transmembrane domains from the following  
742 programs: TMHMM2.0, TMPRED, Uniprot, PHDhtm and CCTOP. The CCTOP site returned predictions for  
743 HMMTOP, Memsat, Octopus, Philius, Phobius, Pro, Prodiv, Scampi, ScampiMsa as well as CCTOP. 14  
744 putative transmembrane domains were predicted by 13 or 14 of these 14 programs. These “consensus

745 sites are shown in Fig 6 and the specific TMHMM2.0 predictions are provided in Table S2. The specific  
746 amino acids predicted to be in each transmembrane domain were often shifted by a few amino acids by  
747 different programs but the putative transmembrane domains substantially overlapped.

748 To examine the topology of Kkv we drove the expression of *UAS-kkv-OH* or *UAS-kkv::NG* by *ptc-GAL4*.  
749 This results in a stripe of expression along the anterior/posterior compartment boundary in wing discs.  
750 Wing discs were dissected in PBS and fixed in the cold for 15'. The discs were then manually cut or  
751 punctured to ensure the apical surface of the epithelial cells was exposed to antibody. They were then  
752 incubated for 30' in PBS supplemented with 10% Sheep Serum. The discs were then stained overnight at  
753 4°C in PBS, 10% sheep serum plus the desired antibody. The discs were then rinsed 4 times in PBS and  
754 then stained with secondary antibody for 3 hrs at room temperature in PBS, 10% sheep serum plus  
755 secondary antibody. After 4 rinses in PBS the discs were washed with PBST (PBS plus .3% triton X100)  
756 followed by three additional washes in PBS. Finally the discs were mounted in ProLong Diamond. As a  
757 control several of the fixed and cut discs had PBST substituted for PBS in all steps in the experiment. The  
758 wing discs were examined on a Zeiss Axioskop II and photographed on a Spot Digital Camera (National  
759 Diagnostics).

760

#### 761 Scanning Electron Microscopy

762 Wings were removed from two day old adult flies. In the experiments described in the paper the wings  
763 contained flip out clones (*AyGal4*) that expressed an RNAi for *kkv* (Trip line – HMC.05880). The hair  
764 phenotype overlapped with that seen previously in clones homozygous for *kkv*<sup>1</sup> with but with a smaller  
765 fraction with the strongest phenotype (Ren et al., 2005). The wings were attached to studs with a  
766 vertical surface with conducting paint and they were then fractured with a tungsten needle. They were  
767 shadowed with platinum and examined in a Zeiss Sigma VP HD field emission Scanning Electron  
768 Microscope (SEM) (NIH 1S100D011966-01A1) at the University of Virginia Advanced Microscopy Facility.

769

#### 770 Figure Legends

771 Figure 1. A. Models for the the relationship between Chitin Synthase and the patterned deposition of  
772 chitin. B. Cartoons showing the proteins encoded by both UAS transgenes and edited genes. The  
773 asterisks indicates the R896K mutation. C. The approach used for the editing of *kkv*. The upward  
774 arrows indicate the target locations of the two guide RNAs. The upper part of the panel shows the 3'  
775 end of *kkv*.

776 Figure 2. The rescue of the wing phenotype of *kkv::smFP* by the expression of a UAS transgene driven by  
777 *ap-Gal4*. A small region from the dorsal and ventral surface of the wing is shown for all genotypes. This  
778 region is from the posterior region. Note the thin bent hairs on both surfaces of the *kkv::smFP*  
779 homozygotes (EF) compared to those in wild type (AB) and *ap>kkv::NG* (CD) wings. Note the rescue in  
780 the dorsal surface of *ap>kkv::NG; kkv::smFP/Df* wings (GH). This is due to *ap* only driving expression of

781 UAS transgenes in the dorsal surface cells. Note the failure to see rescue in *ap>kkv R896K::NG*;  
782 *kkv::smFP* wings (IJ) establishing that only the expression of a functional Kkv protein provides rescue.  
783 The rescue with *ap>kkv mos::NG* can be seen in the image of the dorsal surface of such wings (K)  
784 compared to the ventral surface (L).

785 Figure 3. Localization of Kkv in the pupal wing. A-F. In vivo images of *kkv::NG* pupal wings. All except B  
786 are shown with the same microscope settings. Note the clear labeling of the hairs in wings from 42-58  
787 hr. In the oldest wings the hairs are fainter and the image is from the focal plane where the pedestals  
788 are obvious. We did not detect hair labeling in the youngest wings (A) unless the image was enhance by  
789 brightening in ImageJ or Photoshop (B). G,H,I. Shown is a *ap-Gal4/+; UAS-kkv::NG* pupal 36 hr wing  
790 fixed and F-actin stained with phalloidin (red). Note the NeonGreen is external to the F-actin. One can  
791 also see that the NeonGreen signal is in the hair membrane and does not extend to the center of the  
792 hair. J,K,L. A fixed 48 hr *ap-Gal4/+; UAS-kkv::NG* wing stained for both NeonGreen (J-green) and F-actin  
793 (L-phalloidin - red). Note the bright disc of F-actin staining at the base of the hair is not associated with  
794 an accumulation of Kkv::NG.

795 Figure 4. Localization of Kkv. A. A low magnification image of a *kkv::NG* notum. B. A higher  
796 magnification image of part of a *kkv::NG* notum. Note the stripes of Kkv::NG along the proximal distal  
797 axis of the bristles. The arrows point to several of the fluorescent puncta associated with the expression  
798 of *kkv::NG*. C (C' and C''). A high magnification image of a bristle from a *UAS-ChtVis/+; neur-Gal4/  
799 kkv::NG/+* bristle. Note the relatively smooth bands of chitin and the punctate stripes of Kkv::NG and  
800 the association between the two. D,E,F. Two bristles from a *neur-Gal4/kkv::NG* pupae immunostained  
801 for NeonGreen (green-D) and Kkv (red-F). E is the merged image and shows the high degree of co-  
802 immunostaining. G,H,I. Bristles from a *neur-Gal4/kkv-OH* pupae immunostained for ollas (green-G) and  
803 Kkv (red-I). H is the merged image and shows the high degree of co-immunostaining. J,K,L. A bristle  
804 from a *neur-Gal4/UAS-kkv R896K::NG* pupae immunostained for NeonGreen (green-J) and Kkv (red-L). K  
805 is the merged image and shows the high degree of co-immunostaining. Note the pattern of  
806 accumulation of Kkv R896K::NG is quite abnormal and shows substantial bristle to bristle variation but  
807 the co-localization is consistent. M,N,O. Pupal wings from *ap-Gal4/+; UAS-kkv::NG* immuostained for  
808 NeonGreen (green-M) and Kkv (red-P). N is the mergred imaged and shows the high degree of co-  
809 localization. P,Q,R. Pupal wings from *ap-Gal4/+; UAS-kkv R896K::NG* immuostained for NeonGreen  
810 (green-M) and Kkv (red-P). N is the mergred imaged and shows the localization of the mutant protein is  
811 highly abnormal but the high degree of co-localization remains.

812 Figure 5. Factors that mediate the localization of Kkv in stripes in bristles. A. A *sn f; kkv::NG* bristle by in  
813 vivo imaging. The lack of the large F-actin bundles due to the loss of *sn* and *f* leads to highly abnormal  
814 shape and abnormal patterning of Kkv::NG stripes. B. A *sn f; UAS-ChtVis/+; neur-Gal4/+* bristle by in vivo  
815 imaging. The lack of the large F-actin bundles due to the loss of *sn* and *f* leads to highly abnormal bristle  
816 shape and to abnormal patterning of chitin. C,D,E. A *sn f; UAS-ChtVis/+; neur-Gal4 kkv::NG/kkv::NG*  
817 bristle by in vivo imaging. The lack of the large F-actin bundles due to the loss of *sn* and *f* leads to highly  
818 abnormal shape and abnormal patterning of both chitin (C - red) and Kkv::NG (E – green) stripes. Note  
819 the close association of Kkv and chitin (D- merged image, arrow) even though the pattern as a whole is  
820 highly abnormal. F. A *UAS-dyl RNAi; neur-Gal4 kkv::NG/kkv::NG* thorax by in vivo imaging. Note the

821 bulged bristle (arrow) and the lack/great reduction of Kkv stripes. G A *UAS-Rab11-RNAi; neur-Gal4*  
822 *kkv::NG/kkv::NG* bristle by in vivo imaging. Note the stub bristle phenotype (arrow) and the lack of  
823 *Kkv::NG* stripes. H,I,J. A *UAS-Ruby-Lifeact; neur-Gal4 kkv::NG/kkv::NG* bristle showing the large bundles  
824 of F-actin (H – red) and stripes of *Kkv::NG* (J – green). H', I', L' are higher magnification images where the  
825 overlap between the F-actin bundles and *Kkv::NG* stripes is obvious. KLM. *Kkv::NG* bristles  
826 immunostained with anti-Dyl antibody (K – red) and anti-NeonGreen antibody (M – green). In the  
827 merged image (L) the interdigitated stripes of red and green can be seen (arrow). N-S. Orthogonal  
828 cross sections of bristles of various genotypes. N. *kkv::NG* shows a distinct pattern of stripes. O. *UAS-*  
829 *ChtVis/+; neur-Gal4 kkv::NG/kkv::NG* shows the close association of the chitin bands and the stripes of  
830 *Kkv::NG*. In many cases the chitin is external to *Kkv::NG* (arrows). P. *UAS-Rab11-RNAi; neur-Gal4*  
831 *kkv::NG/kkv::NG* bristles show a failure in the localization of *Kkv* to the plasma membrane. Q. *UAS-dyl*  
832 *RNAi; neur-Gal4 kkv::NG/kkv::NG* bristles show much of the *Kkv::NG* is inserted into the plasma  
833 membrane but it is not localized into the strip pattern (e.g. N). R. *sn f; kkv::NG* bristles have an  
834 abnormal cross section and evidence for abnormal stripes of *Kkv::NG* are evident (arrows). S. *sn f; UAS-*  
835 *ChtVis; neur-Gal4 kkv::NG/kkv::NG* bristles show the expected abnormal cross section shape with the  
836 irregular banding of *Kkv::NG* and chitin. Note the close association of *Kkv::NG* and chitin (arrows) even  
837 in these very abnormal bristles.

838 Fig 6. Topology of *Kkv*. A. *ptc-Gal4 UAS-kkv::NG* (or *UAS-kkv-OH*) wing discs where *kkv* is expressed in a  
839 stripe immunostained with various antibodies with or without detergent treatment (PBS vs PBST). B. A  
840 cartoon showing the consensus transmembrane domains as described in the Methods. The location of  
841 the epitope recognized by each of the antibodies. The data indicate that the amino terminus is  
842 cytoplasmic and the carboxy terminus is extracellular.

843 Fig 7. Expression of *kkv::NG* leads to fluorescent puncta in the space between the pupal cuticle and the  
844 apical surface of the notum epithelial cells. A, B, C. *kkv::NG* pupae. D, E, F. Oregon R pupae. G, H, I.  
845 *ap-Ga4; UAS-mCD8-GFP*. A, D and G are maximal projections of the optical stack regions that encompass  
846 the notum pupal cuticle. The arrow in A and G points to a likely puncta and the arrowheads to the  
847 patterned brightness seen in the pupal cuticle of animals that express a fluorescent membrane protein.  
848 B, E and H are maximal projections of the optical stack regions that encompass the region between the  
849 notum pupal cuticle and the upper most region of the notum epithelial cells (i.e. the bristles that extend  
850 apically). Since there was no fluorescence in E we took the conservative approach of extending this  
851 region of the stack by 50%. The arrows in B and H point to one of the many fluorescent puncta. C, F and  
852 I are maximal projections of the optical stack regions that encompass the region of cellular material  
853 including bristles, hairs and the apical surface of the notum cells. The arrows points to fluorescent  
854 puncta.

855 Fig 8. Examination of *kkv* mutant clones by SEM. A. Three possible models for the phenotypic effects of  
856 a *kkv* mutant cell (in green) on it and its neighbors. In the uppermost the mutant phenotype is rescued  
857 by neighboring wild type cells. In the middle panel the inability to synthesize chitin results in a thinner  
858 wing cuticle and this is hypothesized to be entirely cell autonomous. In the lowest most panel there is  
859 partial rescue of the ability to synthesize chitin and this is graded from neighboring to mutant cell. B. A  
860 relatively low magnification SEM image of a fractured adult wing that contains a clone of *kkv* mutant

861 cells. Arrows point to two of these. C. A region of a wing without any *kkv* clones. Note the relatively  
862 consistent cuticle thickness and the parallel layers. D. A region of a wing that contains a mutant cell  
863 (mutant hair marked by an arrow). Note how thin the mutant cuticle is (arrowhead) compared to the  
864 neighboring wild type cuticle (asterisk). Note also that there is a smooth and graded transition between  
865 the mutant and neighboring cell cuticle. E. Another example of a *kkv* mutant clone as in D.

866

867 Supplemental Figure Legends.

868 Fig S1. The melanotic spot phenotype. A. No melanotic spot phenotype is seen in hypomorphic  
869 *kkv::smFP/Df* flies. B. The over expression of the catalytically inactive Kkv R896K mutant driven by *ap-*  
870 *Gal4* results in the melanotic spot (arrow) phenotype. C. The over expression of Kkv::NG driven by *ap-*  
871 *Gal4* results in the melanotic spot (arrow) phenotype.

872 Fig S2. SEM examination of wing cuticle of edited flies. A. Flies homozygous for *kkv::smFP* show the thin  
873 bent and curved wing hair phenotype. B. *kkv::smFP/Df* flies show a slightly enhanced wing hair  
874 phenotype. C. Flies homozygous for *kkv::NG* have normal wing hairs. D. *Kkv::NG/DF* flies also have normal  
875 wing hairs. E. Oregon R wild type flies have normal wing hairs. F. Ore-R/*Df* flies also have normal wing  
876 hairs showing that *kkv* is not haplo-insufficient.

877 Fig S3. *kkv::NG* is much brighter than *kkv::smFP*. A. Image of live *kkv::NG* thorax (maximal projection) as  
878 obtained from the confocal with no modifications. The arrows point to fluorescent puncta. The image  
879 was obtained with a lower laser power than we typically used to increase the range of brightness. B image  
880 of live *kkv::smFP* as obtained from the confocal using the same settings as in A. C. The image from A  
881 brightened in Photoshop by +150. D. The image in B brightened in Photoshop by +150. E. The image in C  
882 brightened by a further +150. F. The image from D brightened by a further +150. G. The image from E  
883 with both the brightness and contrast increased by 150. H. The image from E with both the brightness  
884 and contrast increased by 150. Hairs on the notum are finally visible and a bristle is barely visible. The  
885 asterisks mark pupal cuticle. The *kkv::NG* animal was a few hrs younger (48 hr awp) than the *kkv::smFP*  
886 animal (52 hr awp). Since 52 hr animals show slightly higher fluorescence this figure slightly  
887 underestimates the difference in brightness.

888 Fig S4. Comparison of the subcellular localization of Kkv::NG and Kkv R896K::NG. A. Image of live 44hr  
889 *ap>kkv::NG* pupal wing. B. Image of live 44hr *ap>kkv-R896K::NG* pupal wing. C. Image of a 36hr  
890 *ap>kkv::NG* pupal wing fixed and stained with both anti-NG antibody (green) and Alexa 568 phalloidin  
891 (red) to show F-actin. D. Image of a 36hr *ap>kkv R896K::NG* pupal wing fixed and stained with both anti-  
892 NG antibody (green) and Alexa 568 phalloidin (red) to show F-actin. E. Image of a live 52 hr *ap>kkv::NG*  
893 pupal wing showing a bristle with Kkv stripes. The arrows point to shed fluorescent puncta. F. Image of a  
894 live 52 hr *ap>kkv R896K::NG* pupal wing showing a bristle with abnormal accumulation of Kkv. G.  
895 Orthogonal cross sections of bristles from *ap>kkv::NG* live pupae. H. Orthogonal cross sections of bristles  
896 from *ap>kkv R896K::NG* live pupae. Note the stripes in G and the mislocalized Kkv in H. I. A live dissected  
897 salivary gland from a *ptc-Gal4/+; UAS-kkv::NG* third instar larva. The Kkv::NG preferentially accumulates  
898 on the apical surface of the gland (arrow) next to the lumen (asterisk). I' is a blow up of a single optical



899 section of a *ptc-Gal4/+; UAS-kkv::NG* salivary gland. Note the many round vesicles with puncta obvious in  
900 the membrane of these vesicles (arrow). J. A live dissected salivary gland from a *ptc-Gal4/+; UAS-kkv*  
901 *R896K::NG* third instar larva. The Kkv R896K::NG does not preferentially accumulate on the apical surface  
902 of the gland next to the lumen (asterisk). Rather, it is rather evenly distributed across the cytoplasm. J'.  
903 The blow up shows a different morphology in how the protein accumulates compared to Kkv::NG (I').

904 Fig S5. Specificity of Kkv staining. A. A *ptc-Gal4/UAS-ChtVis; UAS-kkv::NG* wing disc shows the  
905 accumulation of Kkv::NG in the *ptc* domain (arrow). The secreted ChtVis (red) diffuses all over the disc  
906 in the extracellular domain that separates the disc epithelium and the peripodial membrane. B. Kkv::NG  
907 preferentially accumulates on the apical surface of disc cells (arrow). C-F. Comparisons of *kkv::NG* (CE)  
908 and Ore-R (DF) 63 hr awp pupae by live imaging. C and D were taken at the same microscope settings as  
909 were E and F. Note the bristle, hair and cell membrane fluorescence of Kkv::NG is specific and not seen  
910 in Ore-R. The arrows in C and D point to auto-fluorescent pupal cuticle. E and F are higher  
911 magnification images that show the stripes of Kkv::NG in bristles and the lack of such fluorescence in  
912 Ore-R.

913

914 Fig S6. Kkv::NG fluorescence as a function of developmental time since white prepupae formation. All  
915 images were taken at the same microscope setting.

916

917 Fig S7. How geometry affects optical sectioning of bristles. A cartoon of a bristle (B) in cross section is  
918 shown with intracellular bands of red and extracellular bands of green. The arrows indicate different  
919 planes of sectioning and the images the arrow point to show the expected resulting images and how  
920 these can differ depending on the location and orientation of the optical sections.

921

922 Fig S8. The accumulation of Dyl in stripes in bristles is altered in *sn f* double mutants. A. A *sn f* bristle  
923 immunostained with anti-Dyl antibodies. Note the parallel lines of Dyl staining (Nagaraj and Adler,  
924 2012) are disrupted. B. Cross sections of several *sn f* bristles immunostained for Dyl. Note the  
925 disruption in staining and the retention of lines of Dyl is variable from bristle to bristle.

926

927 Fig S9. Kkv::NG dependent puncta in live pupae. A. Many puncta (arrow) are visible in the space  
928 between the pupal cuticle and the notum epidermis in 50 hr awp pupa. The pupal cuticle is visible  
929 (asterisk) due to autofluorescence. B. Puncta are visible and concentrated along the mid line of a 20 hr  
930 awp *kkv::NG* pupa. At this time the epidermal cells are still attached to the pupal cuticle they  
931 synthesized so the cellular outlines are visible. C. Puncta are visible (arrow) in the space between the  
932 pupal cuticle and the notum epidermis in 50 hr awp *ap-Gal4/+; UAS-kkv::NG/+* pupa. D. No puncta are  
933 visible (arrow) in the space between the pupal cuticle and the notum epidermis in 50 hr awp *ap-Gal4/+;*  
934 *UAS-kkv R896K::NG/+* pupa. This is likely due primarily to the protein not being localized properly to the  
935 apical surface.

936

937 Fig s10. Puncta associated with pupal cuticle can be stained with both anti-NG and anti-Kkv antibodies.  
938 Pupal cuticle was fixed and dissected from 42 hr *kkv::NG* pupae and immunostained with both anti-NG  
939 and anti-Kkv antibodies. Many puncta were visible and a large number of these stained with both

940 antibodies consistent with the hypothesis that the puncta visualized by in vivo imaging of NeonGreen  
941 also contained Kkv.

942

943

#### 944 Acknowledgements

945 This research was supported by funds provided by the W. R. Kenan Chair to the author  
946 and to a limited extent personal funds of the author. The author thanks H.S. Tzu for  
947 helpful conversations. “We acquired confocal images using the Keck Center Zeiss 780  
948 Confocal microscopy system (NIH OD016446). We acquired Scanning Electron  
949 Microscope images at the Advanced Microscopy Facility at the University of Virginia.  
950 The images were obtained on a Zeiss VP HD SEM field purchased with a grant from the  
951 NIH (NIH 1S10OD011966).

952

#### 953 References

- 954 **Adler, P. N.** (2017). Gene expression and morphogenesis during the deposition of *Drosophila* wing  
955 cuticle. *Fly (Austin)* **11**, 194-199.
- 956 **Adler, P. N., Sobala, L. F., Thom, D. and Nagaraj, R.** (2013). *dusky-like* is required to maintain the  
957 integrity and planar cell polarity of hairs during the development of the *Drosophila* wing.  
958 *Developmental biology* **379**, 76-91.
- 959 **Bischof, J., Maeda, R. K., Hediger, M., Karch, F. and Basler, K.** (2007). An optimized transgenesis system  
960 for *Drosophila* using germ-line-specific phiC31 integrases. *Proceedings of the National Academy  
961 of Sciences of the United States of America* **104**, 3312-3317.
- 962 **Bouligand, Y.** (1972). Twisted fibrous arrangements in biological materials and cholesteric mesophases.  
963 *Tissue Cell* **4**, 189-217.
- 964 **Broehan, G., Zimoch, L., Wessels, A., Ertas, B. and Merzendorfer, H.** (2007). A chymotrypsin-like serine  
965 protease interacts with the chitin synthase from the midgut of the tobacco hornworm. *J Exp Biol*  
966 **210**, 3636-3643.
- 967 **Cabib, E. and Bowers, B.** (1971). Chitin and yeast budding. Localization of chitin in yeast bud scars. *J Biol  
968 Chem* **246**, 152-159.
- 969 **Calero-Cuenca, F. J. and Sotillos, S.** (2018). Nuf and Rip11 requirement for polarity determinant  
970 recycling during *Drosophila* development. *Small GTPases* **9**, 352-359.
- 971 **Chanut-Delalande, H., Ferrer, P., Payre, F. and Plaza, S.** (2012). Effectors of tridimensional cell  
972 morphogenesis and their evolution. *Seminars in cell & developmental biology* **23**, 341-349.
- 973 **Chaudhari, S. S., Arakane, Y., Specht, C. A., Moussian, B., Boyle, D. L., Park, Y., Kramer, K. J., Beeman,  
974 R. W. and Muthukrishnan, S.** (2011). Knickkopf protein protects and organizes chitin in the  
975 newly synthesized insect exoskeleton. *Proceedings of the National Academy of Sciences of the  
976 United States of America* **108**, 17028-17033.
- 977 **Chuang, J. S. and Schekman, R. W.** (1996). Differential trafficking and timed localization of two chitin  
978 synthase proteins, Chs2p and Chs3p. *J Cell Biol* **135**, 597-610.

- 979 **Devine, W. P., Lubarsky, B., Shaw, K., Luschnig, S., Messina, L. and Krasnow, M. A.** (2005). Requirement  
980 for chitin biosynthesis in epithelial tube morphogenesis. *Proceedings of the National Academy of*  
981 *Sciences of the United States of America* **102**, 17014-17019.
- 982 **Dietzl, G., Chen, D., Schnorrer, F., Su, K. C., Barinova, Y., Fellner, M., Gasser, B., Kinsey, K., Oettel, S.,**  
983 **Scheiblauer, S., et al.** (2007). A genome-wide transgenic RNAi library for conditional gene  
984 inactivation in *Drosophila*. *Nature* **448**, 151-156.
- 985 **Dorfmueller, H. C., Ferenbach, A. T., Borodkin, V. S. and van Aalten, D. M.** (2014). A structural and  
986 biochemical model of processive chitin synthesis. *J Biol Chem* **289**, 23020-23028.
- 987 **Dos Santos, G., Schroeder, A. J., Goodman, J. L., Strelets, V. B., Crosby, M. A., Thurmond, J., Emmert,**  
988 **D. B., Gelbart, W. M. and FlyBase, C.** (2015). FlyBase: introduction of the *Drosophila*  
989 *melanogaster* Release 6 reference genome assembly and large-scale migration of genome  
990 annotations. *Nucleic acids research* **43**, D690-697.
- 991 **Elieh-Ali-Komi, D. and Hamblin, M. R.** (2016). Chitin and Chitosan: Production and Application of  
992 Versatile Biomedical Nanomaterials. *Int J Adv Res (Indore)* **4**, 411-427.
- 993 **Fernandes, I., Chanut-Delalande, H., Ferrer, P., Latapie, Y., Waltzer, L., Affolter, M., Payre, F. and Plaza,**  
994 **S.** (2010). Zona pellucida domain proteins remodel the apical compartment for localized cell  
995 shape changes. *Dev Cell* **18**, 64-76.
- 996 **Foltman, M., Filali-Mounecef, Y., Crespo, D. and Sanchez-Diaz, A.** (2018). Cell polarity protein Spa2  
997 coordinates Chs2 incorporation at the division site in budding yeast. *PLoS genetics* **14**,  
998 e1007299.
- 999 **Gohlke, S., Muthukrishnan, S. and Merzendorfer, H.** (2017). In Vitro and In Vivo Studies on the  
1000 Structural Organization of Chs3 from *Saccharomyces cerevisiae*. *Int J Mol Sci* **18**.
- 1001 **Guild, G. M., Connelly, P. S., Vranich, K. A., Shaw, M. K. and Tilney, L. G.** (2002). Actin filament turnover  
1002 removes bundles from *Drosophila* bristle cells. *Journal of cell science* **115**, 641-653.
- 1003 **Hatan, M., Shinder, V., Israeli, D., Schnorrer, F. and Volk, T.** (2011). The *Drosophila* blood brain barrier  
1004 is maintained by GPCR-dependent dynamic actin structures. *J Cell Biol* **192**, 307-319.
- 1005 **Hernandez-Gonzalez, M., Bravo-Plaza, I., Pinar, M., de Los Rios, V., Arst, H. N., Jr. and Penalva, M. A.**  
1006 (2018). Endocytic recycling via the TGN underlies the polarized hyphal mode of life. *PLoS*  
1007 *genetics* **14**, e1007291.
- 1008 **Jovine, L., Darie, C. C., Litscher, E. S. and Wassarman, P. M.** (2005). Zona pellucida domain proteins.  
1009 *Annual review of biochemistry* **74**, 83-114.
- 1010 **Jovine, L., Qi, H., Williams, Z., Litscher, E. and Wassarman, P. M.** (2002). The ZP domain is a conserved  
1011 module for polymerization of extracellular proteins. *Nature cell biology* **4**, 457-461.
- 1012 **Karouzou, M. V., Spyropoulos, Y., Iconomidou, V. A., Cornman, R. S., Hamodrakas, S. J. and Willis, J. H.**  
1013 (2007). *Drosophila* cuticular proteins with the R&R Consensus: annotation and classification with  
1014 a new tool for discriminating RR-1 and RR-2 sequences. *Insect biochemistry and molecular*  
1015 *biology* **37**, 754-760.
- 1016 **Knafler, H. C., Smaczynska-de, R., II, Walker, L. A., Lee, K. K., Gow, N. A. R. and Ayscough, K. R.** (2019).  
1017 AP-2-Dependent Endocytic Recycling of the Chitin Synthase Chs3 Regulates Polarized Growth in  
1018 *Candida albicans*. *MBio* **10**.
- 1019 **Kozubowski, L., Panek, H., Rosenthal, A., Bloecher, A., DeMarini, D. J. and Tatchell, K.** (2003). A Bni4-  
1020 Glc7 phosphatase complex that recruits chitin synthase to the site of bud emergence. *Mol Biol*  
1021 *Cell* **14**, 26-39.
- 1022 **Lambert, T. and Thorn, K.** (2019). FPbase.org - The Fluorescent Protein Database.
- 1023 **Latge, J. P., Mouyna, I., Tekaia, F., Beauvais, A., Debeaupuis, J. P. and Nierman, W.** (2005). Specific  
1024 molecular features in the organization and biosynthesis of the cell wall of *Aspergillus fumigatus*.  
1025 *Med Mycol* **43 Suppl 1**, S15-22.

- 1026 **Leal-Morales, C. A., Bracker, C. E. and Bartnicki-Garcia, S.** (1994). Subcellular localization, abundance  
1027 and stability of chitin synthetases 1 and 2 from *Saccharomyces cerevisiae*. *Microbiology* **140** ( Pt  
1028 **9**), 2207-2216.
- 1029 **Lichtenthaler, S. F., Lemberg, M. K. and Fluhrer, R.** (2018). Proteolytic ectodomain shedding of  
1030 membrane proteins in mammals—hardware, concepts, and recent developments. *EMBO J* **37**.
- 1031 **Maue, L., Meissner, D. and Merzendorfer, H.** (2009). Purification of an active, oligomeric chitin synthase  
1032 complex from the midgut of the tobacco hornworm. *Insect biochemistry and molecular biology*  
1033 **39**, 654-659.
- 1034 **McGuire, S. E., Mao, Z. and Davis, R. L.** (2004). Spatiotemporal gene expression targeting with the  
1035 TARGET and gene-switch systems in *Drosophila*. *Sci STKE* **2004**, pl6.
- 1036 **Merzendorfer, H.** (2006). Insect chitin synthases: a review. *J Comp Physiol B* **176**, 1-15.  
1037 The cellular basis of chitin synthesis in fungi and insects: common principles and differences.  
1038 *European journal of cell biology* **90**, 759-769.
- 1039 **Merzendorfer, H. and Zimoch, L.** (2003). Chitin metabolism in insects: structure, function and regulation  
1040 of chitin synthases and chitinases. *J Exp Biol* **206**, 4393-4412.
- 1041 **Moussian, B.** (2013). The apical plasma membrane of chitin-synthesizing epithelia. *Insect science* **20**,  
1042 139-146.
- 1043 **Moussian, B., Letizia, A., Martinez-Corrales, G., Rotstein, B., Casali, A. and Llimargas, M.** (2015).  
1044 Deciphering the genetic programme triggering timely and spatially-regulated chitin deposition.  
1045 *PLoS genetics* **11**, e1004939.
- 1046 **Moussian, B., Schwarz, H., Bartoszewski, S. and Nusslein-Volhard, C.** (2005). Involvement of chitin in  
1047 exoskeleton morphogenesis in *Drosophila melanogaster*. *Journal of morphology* **264**, 117-130.
- 1048 **Moussian, B., Seifarth, C., Muller, U., Berger, J. and Schwarz, H.** (2006a). Cuticle differentiation during  
1049 *Drosophila* embryogenesis. *Arthropod structure & development* **35**, 137-152.
- 1050 **Moussian, B., Tang, E., Tønning, A., Helms, S., Schwarz, H., Nusslein-Volhard, C. and Uv, A. E.** (2006b).  
1051 *Drosophila* Knickkopf and Retroactive are needed for epithelial tube growth and cuticle  
1052 differentiation through their specific requirement for chitin filament organization. *Development*  
1053 **133**, 163-171.
- 1054 **Moussian, B., Veerkamp, J., Muller, U. and Schwarz, H.** (2007). Assembly of the *Drosophila* larval  
1055 exoskeleton requires controlled secretion and shaping of the apical plasma membrane. *Matrix*  
1056 *biology : journal of the International Society for Matrix Biology* **26**, 337-347.
- 1057 **Muszkieta, L., Aïmanianda, V., Mellado, E., Gribaldo, S., Alcazar-Fuoli, L., Szewczyk, E., Prevost, M. C.**  
1058 **and Latge, J. P.** (2014). Deciphering the role of the chitin synthase families 1 and 2 in the in vivo  
1059 and in vitro growth of *Aspergillus fumigatus* by multiple gene targeting deletion. *Cell Microbiol*  
1060 **16**, 1784-1805.
- 1061 **Nagahashi, S., Sudoh, M., Ono, N., Sawada, R., Yamaguchi, E., Uchida, Y., Mio, T., Takagi, M., Arisawa,**  
1062 **M. and Yamada-Okabe, H.** (1995). Characterization of chitin synthase 2 of *Saccharomyces*  
1063 *cerevisiae*. Implication of two highly conserved domains as possible catalytic sites. *J Biol Chem*  
1064 **270**, 13961-13967.
- 1065 **Nagaraj, R. and Adler, P. N.** (2012). Dusky-like functions as a Rab11 effector for the deposition of cuticle  
1066 during *Drosophila* bristle development. *Development* **139**, 906-916.
- 1067 **Ostrowski, S., Dierick, H. A. and Bejsovec, A.** (2002). Genetic control of cuticle formation during  
1068 embryonic development of *Drosophila melanogaster*. *Genetics* **161**, 171-182.
- 1069 **Ozturk-Colak, A., Moussian, B., Araujo, S. J. and Casanova, J.** (2016). A feedback mechanism converts  
1070 individual cell features into a supracellular ECM structure in *Drosophila* trachea. *Elife* **5**.
- 1071 **Park, S. H., Cheong, C., Idoyaga, J., Kim, J. Y., Choi, J. H., Do, Y., Lee, H., Jo, J. H., Oh, Y. S., Im, W., et al.**  
1072 (2008). Generation and application of new rat monoclonal antibodies against synthetic FLAG and  
1073 OLLAS tags for improved immunodetection. *J Immunol Methods* **331**, 27-38.

- 1074 Perkins, L. A., Holderbaum, L., Tao, R., Hu, Y., Sopko, R., McCall, K., Yang-Zhou, D., Flockhart, I., Binari,  
1075 R., Shim, H. S., et al. (2015). The Transgenic RNAi Project at Harvard Medical School: Resources  
1076 and Validation. *Genetics* **201**, 843-852.
- 1077 Polko, J. K. and Kieber, J. J. (2019). The Regulation of Cellulose Biosynthesis in Plants. *Plant Cell* **31**, 282-  
1078 296.
- 1079 Ren, N., Zhu, C., Lee, H. and Adler, P. N. (2005). Gene expression during Drosophila wing morphogenesis  
1080 and differentiation. *Genetics* **171**, 625-638.
- 1081 Riedl, J., Crevenna, A. H., Kessenbrock, K., Yu, J. H., Neukirchen, D., Bista, M., Bradke, F., Jenne, D.,  
1082 Holak, T. A., Werb, Z., et al. (2008). Lifeact: a versatile marker to visualize F-actin. *Nat Methods*  
1083 **5**, 605-607.
- 1084 Ryder, E., Ashburner, M., Bautista-Llacer, R., Drummond, J., Webster, J., Johnson, G., Morley, T., Chan,  
1085 Y. S., Blows, F., Coulson, D., et al. (2007). The DrosDel deletion collection: a Drosophila  
1086 genomewide chromosomal deficiency resource. *Genetics* **177**, 615-629.
- 1087 Sacristan, C., Manzano-Lopez, J., Reyes, A., Spang, A., Muniz, M. and Roncero, C. (2013).  
1088 Oligomerization of the chitin synthase Chs3 is monitored at the Golgi and affects its endocytic  
1089 recycling. *Mol Microbiol* **90**, 252-266.
- 1090 Saiz-Baggetto, S., Mendez, E., Quilis, I., Igual, J. C. and Bano, M. C. (2017). Chimeric proteins tagged  
1091 with specific 3xHA cassettes may present instability and functional problems. *PLoS One* **12**,  
1092 e0183067.
- 1093 Santos, B. and Snyder, M. (1997). Targeting of chitin synthase 3 to polarized growth sites in yeast  
1094 requires Chs5p and Myo2p. *J Cell Biol* **136**, 95-110.
- 1095 Shaner, N. C., Lambert, G. G., Chammas, A., Ni, Y., Cranfill, P. J., Baird, M. A., Sell, B. R., Allen, J. R.,  
1096 Day, R. N., Israelsson, M., et al. (2013). A bright monomeric green fluorescent protein derived  
1097 from Branchiostoma lanceolatum. *Nat Methods* **10**, 407-409.
- 1098 Sobala, L. F. and Adler, P. N. (2016). The Gene Expression Program for the Formation of Wing Cuticle in  
1099 Drosophila. *PLoS genetics* **12**, e1006100.
- 1100 Sobala, L. F., Wang, Y. and Adler, P. N. (2015). ChtVis-Tomato, a genetic reporter for in vivo visualization  
1101 of chitin deposition in Drosophila. *Development* **142**, in press.
- 1102 Thurmond, J., Goodman, J. L., Strelets, V. B., Attrill, H., Gramates, L S., Marygold, S. J., Matthews, B.  
1103 B., Millburn, G., Antonazzo, G., Trovisco, V., et al. (2018). FlyBase 2.0: the next generation.  
1104 *Nucleic acids research* **47**, D759-D765.
- 1105 Tilney, L. G., Connelly, P. S., Ruggiero, L., Vranich, K. A., Guild, G. M. and Derosier, D. (2004). The role  
1106 actin filaments play in providing the characteristic curved form of Drosophila bristles. *Mol Biol*  
1107 *Cell* **15**, 5481-5491.
- 1108 Tilney, L. G., Tilney, M. S. and Guild, G. M. (1995). F actin bundles in Drosophila bristles. I. Two filament  
1109 cross-links are involved in bundling. *J Cell Biol* **130**, 629-638.
- 1110 Tønning, A., Hemphala, J., Tang, E., Nannmark, U., Samakovlis, C. and Uv, A. (2005). A transient luminal  
1111 chitinous matrix is required to model epithelial tube diameter in the Drosophila trachea. *Dev*  
1112 *Cell* **9**, 423-430.
- 1113 Turner, C. M. and Adler, P. N. (1998). Distinct roles for the actin and microtubule cytoskeletons in the  
1114 morphogenesis of epidermal hairs during wing development in Drosophila. *Mech Dev* **70**, 181-  
1115 192.
- 1116 van Niel, G., D'Angelo, G. and Raposo, G. (2018). Shedding light on the cell biology of extracellular  
1117 vesicles. *Nat Rev Mol Cell Biol* **19**, 213-228.
- 1118 Viswanathan, S., Williams, M. E., Bloss, E. B., Stasevich, T. J., Speer, C. M., Nern, A., Pfeiffer, B. D.,  
1119 Hooks, B. M., Li, W. P., English, B. P., et al. (2015). High-performance probes for light and  
1120 electron microscopy. *Nat Methods* **12**, 568-576.

- 1121 **Welz, T., Wellbourne-Wood, J. and Kerkhoff, E.** (2014). Orchestration of cell surface proteins by Rab11.  
1122 *Trends Cell Biol* **24**, 407-415.
- 1123 **Willis, J. H.** (2010). Structural cuticular proteins from arthropods: annotation, nomenclature, and  
1124 sequence characteristics in the genomics era. *Insect biochemistry and molecular biology* **40**, 189-  
1125 204.
- 1126 **Wong, L. L. and Adler, P. N.** (1993). Tissue polarity genes of *Drosophila* regulate the subcellular location  
1127 for prehair initiation in pupal wing cells. *J Cell Biol* **123**, 209-221.
- 1128 **Yabe, T., Yamada-Okabe, T., Nakajima, T., Sudoh, M., Arisawa, M. and Yamada-Okabe, H.** (1998).  
1129 Mutational analysis of chitin synthase 2 of *Saccharomyces cerevisiae*. Identification of additional  
1130 amino acid residues involved in its catalytic activity. *Eur J Biochem* **258**, 941-947.
- 1131 **Zhang, X. and Zhu, K. Y.** (2013). Biochemical characterization of chitin synthase activity and inhibition in  
1132 the African malaria mosquito, *Anopheles gambiae*. *Insect science* **20**, 158-166.
- 1133 **Zimoch, L. and Merzendorfer, H.** (2002). Immunolocalization of chitin synthase in the tobacco  
1134 hornworm. *Cell Tissue Res* **308**, 287-297.
- 1135

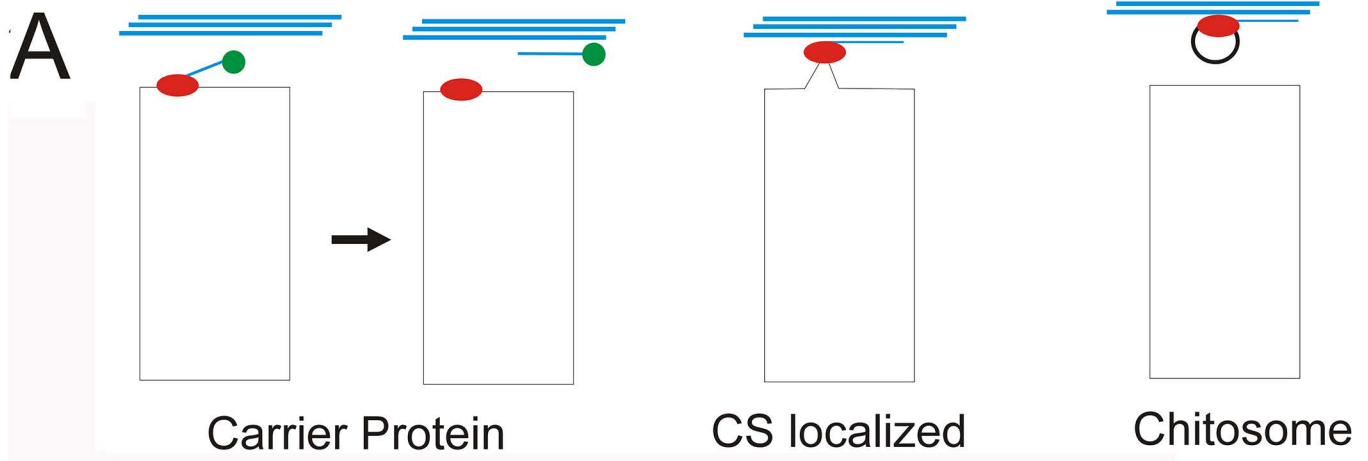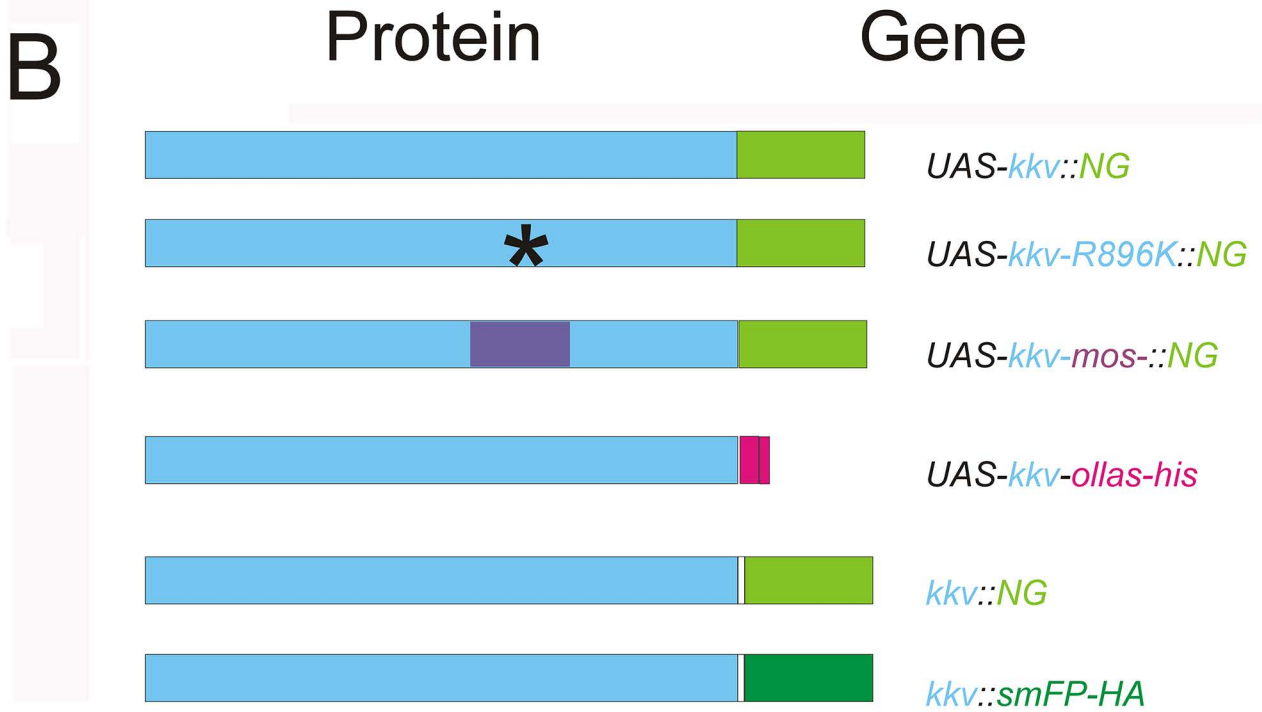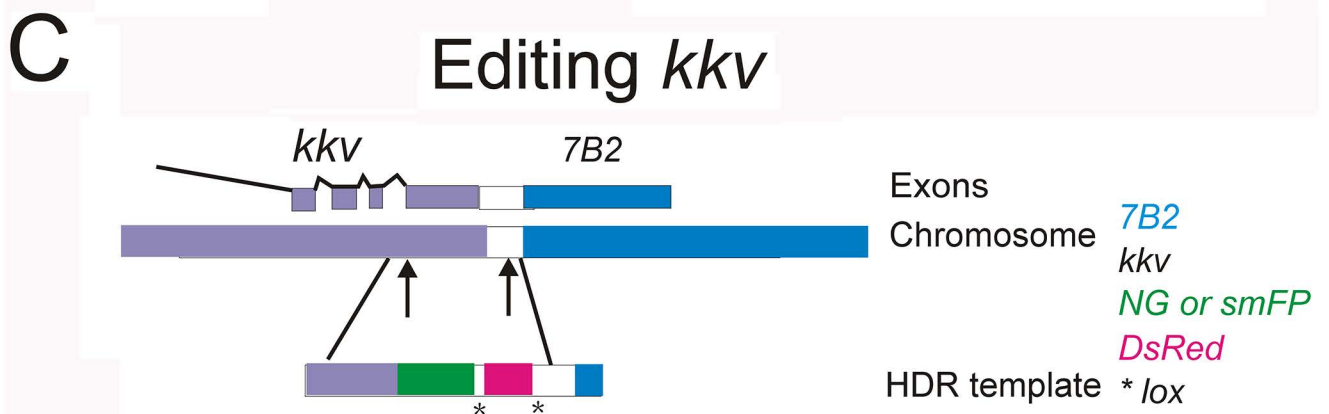

Figure 1

dorsal

ventral

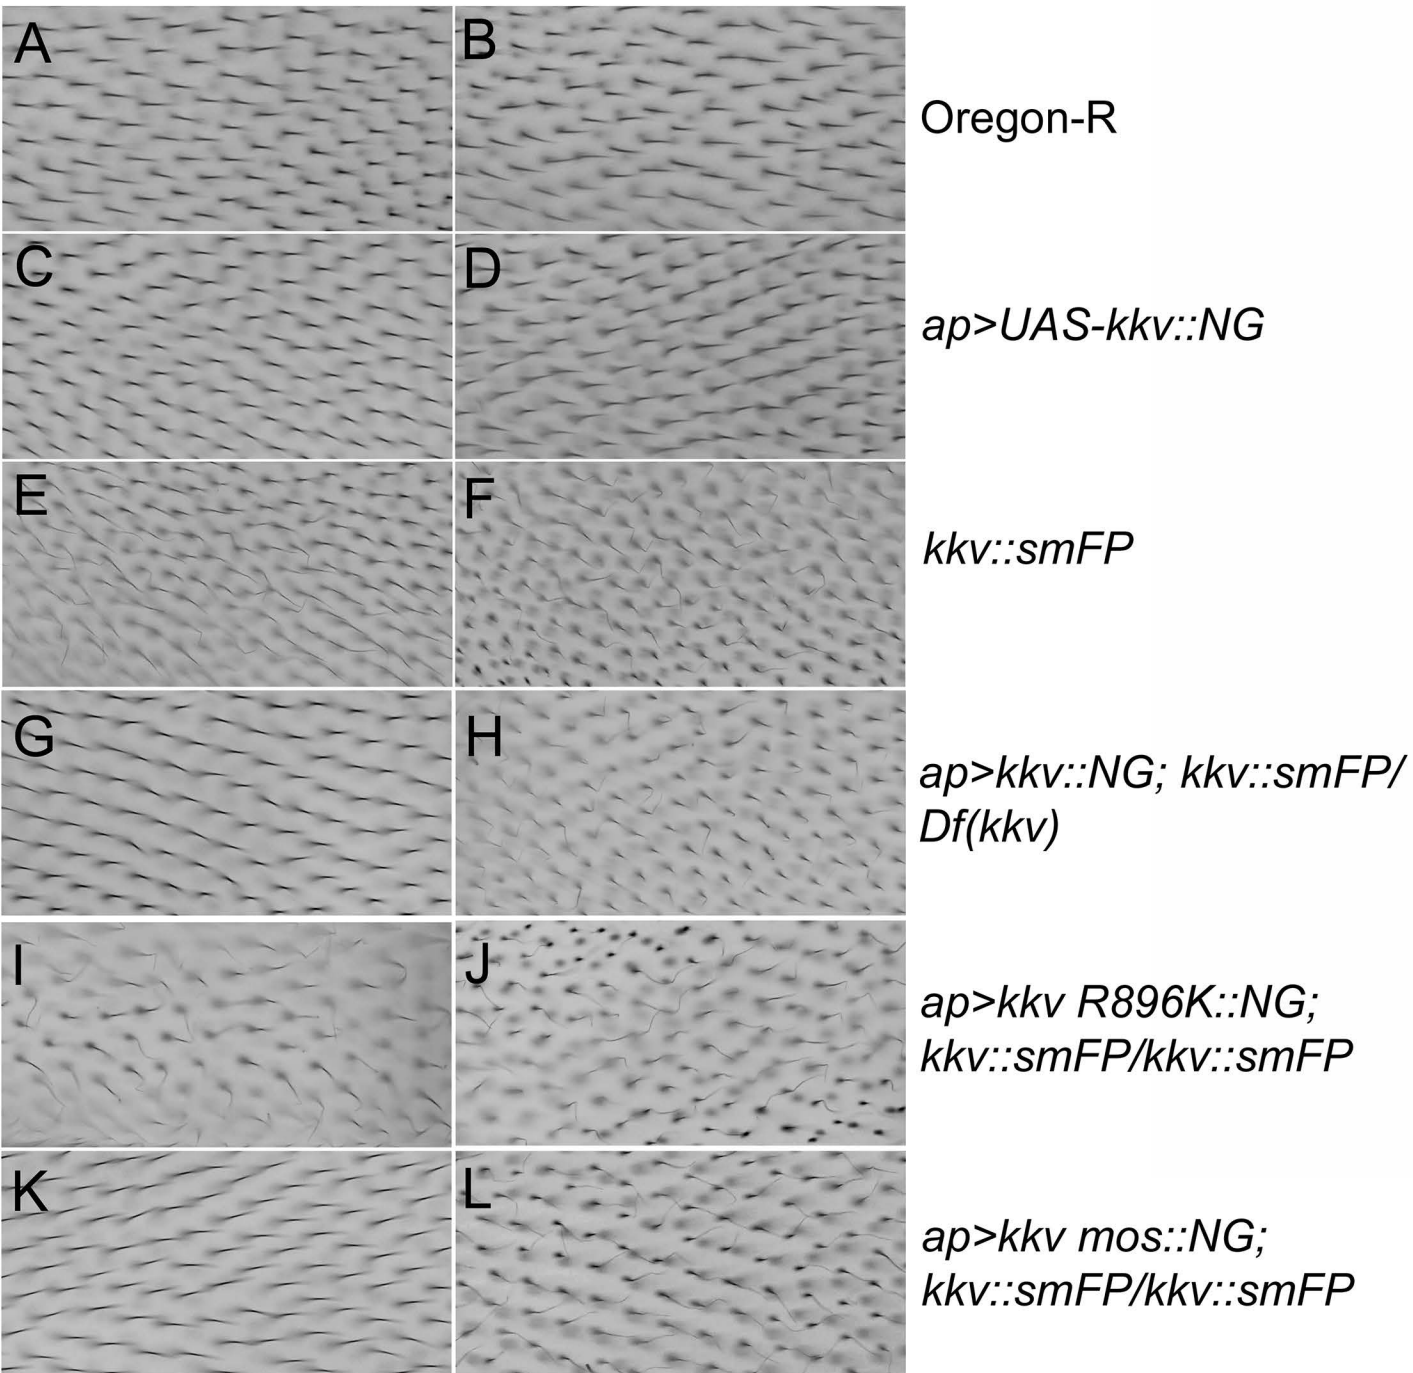

Fig 2



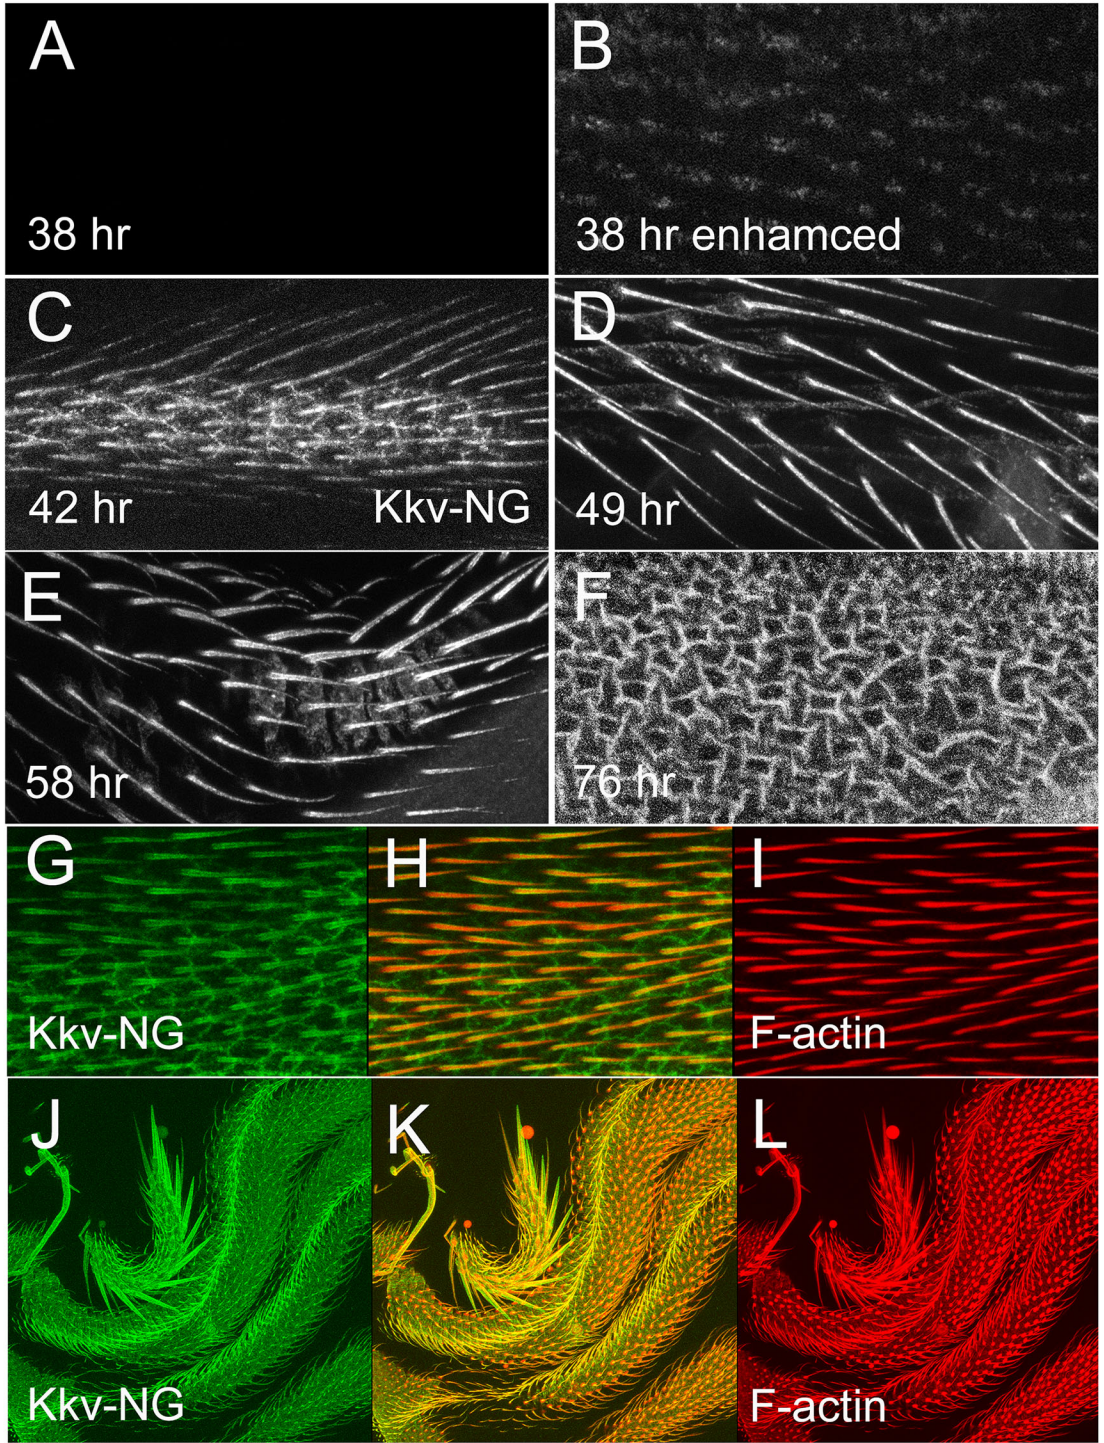

Figure 3

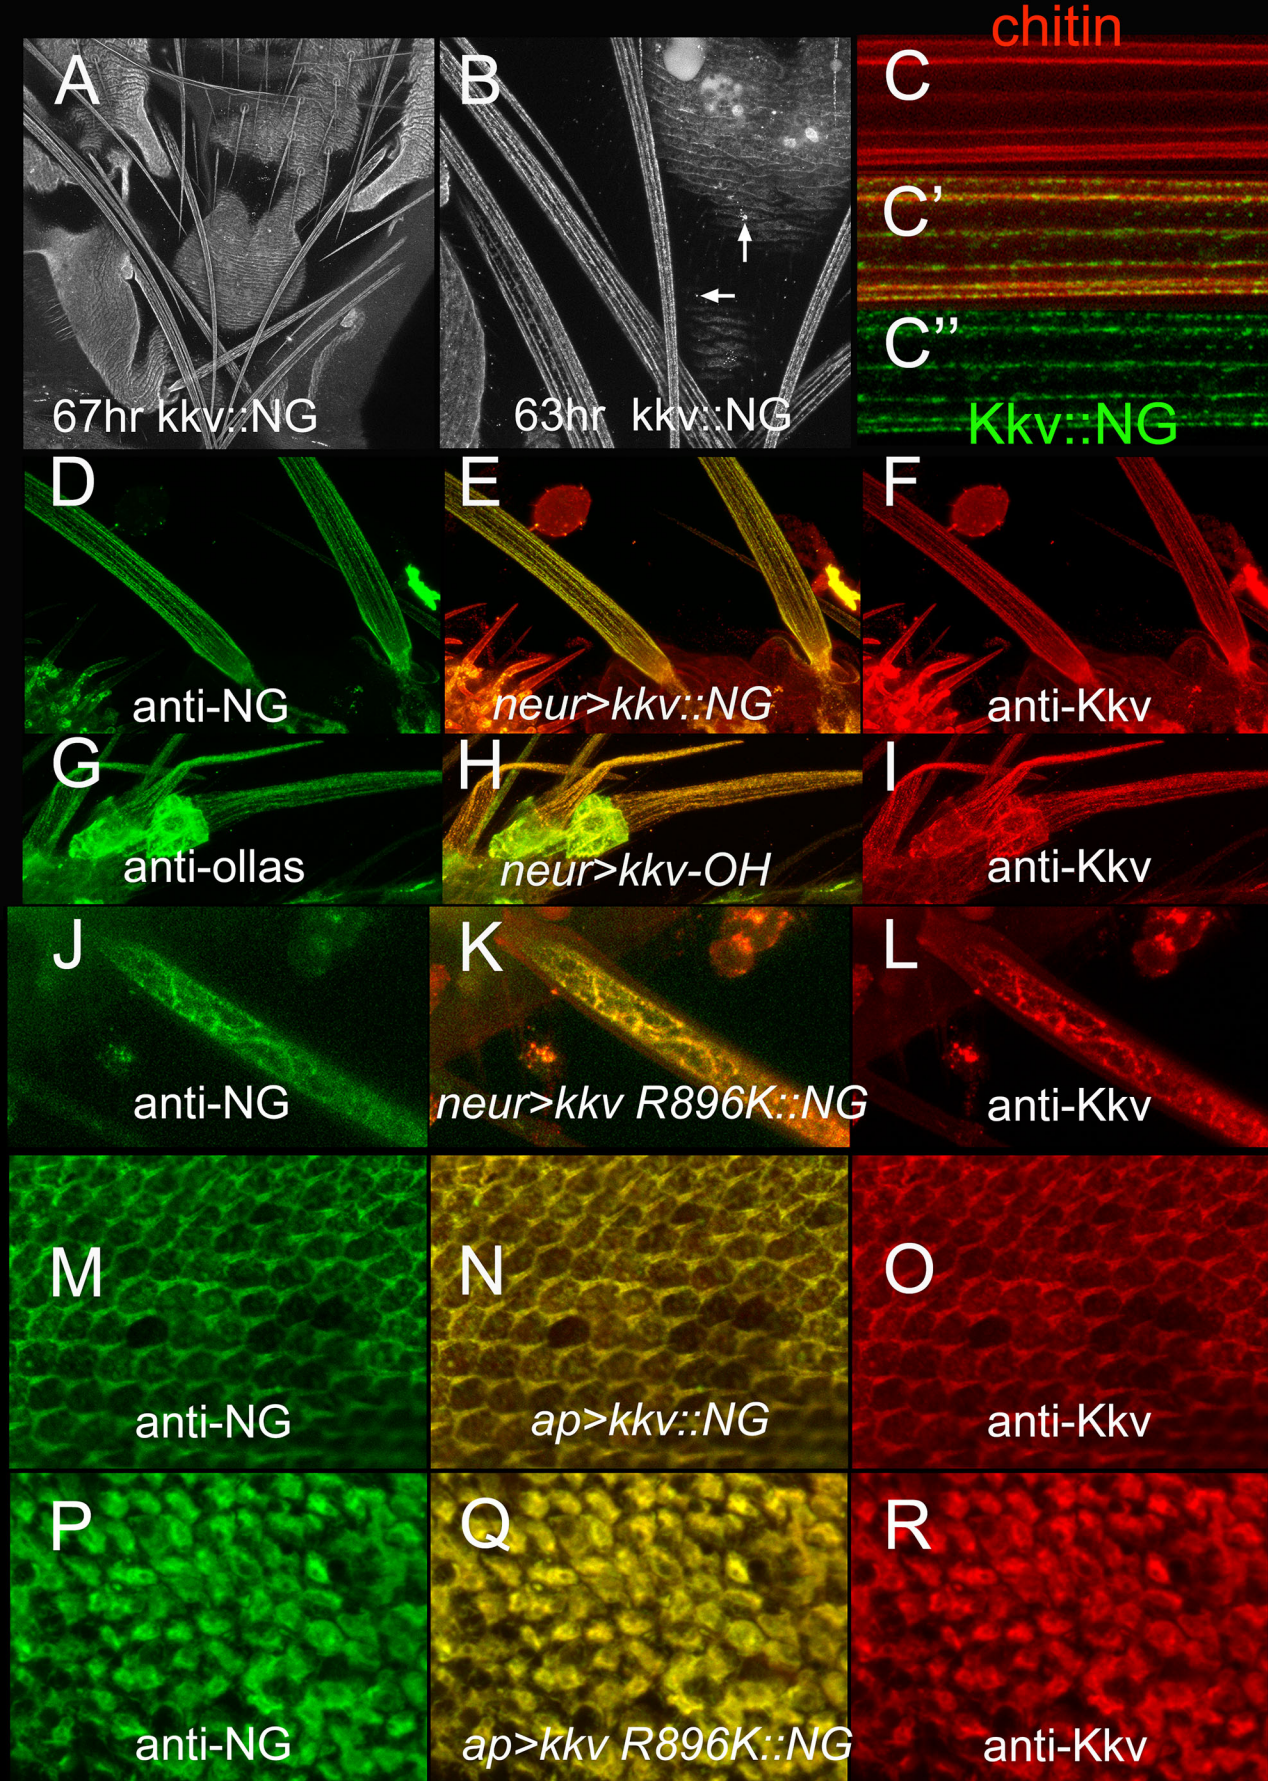

Figure 4

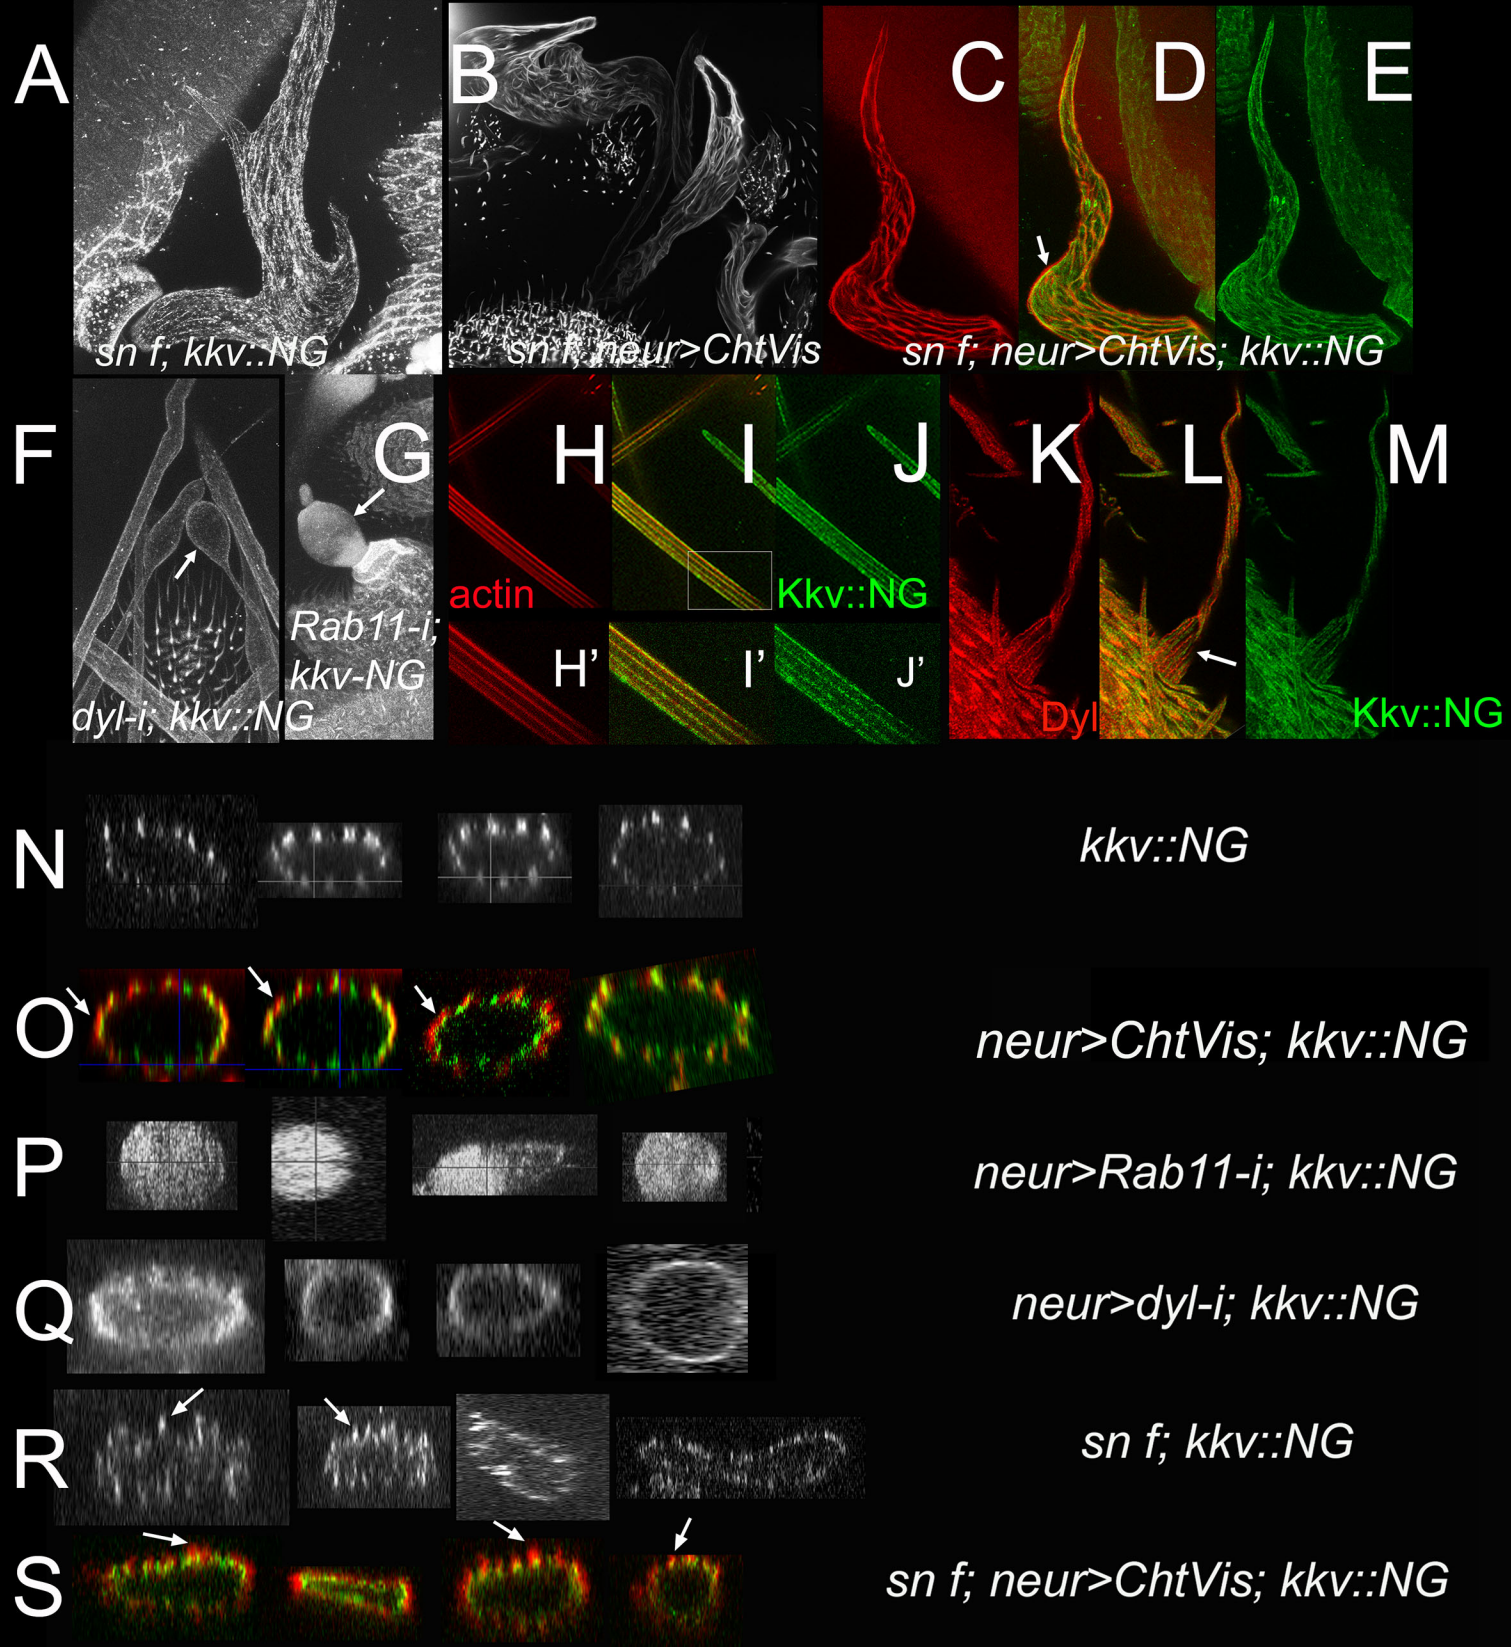

Figure 5



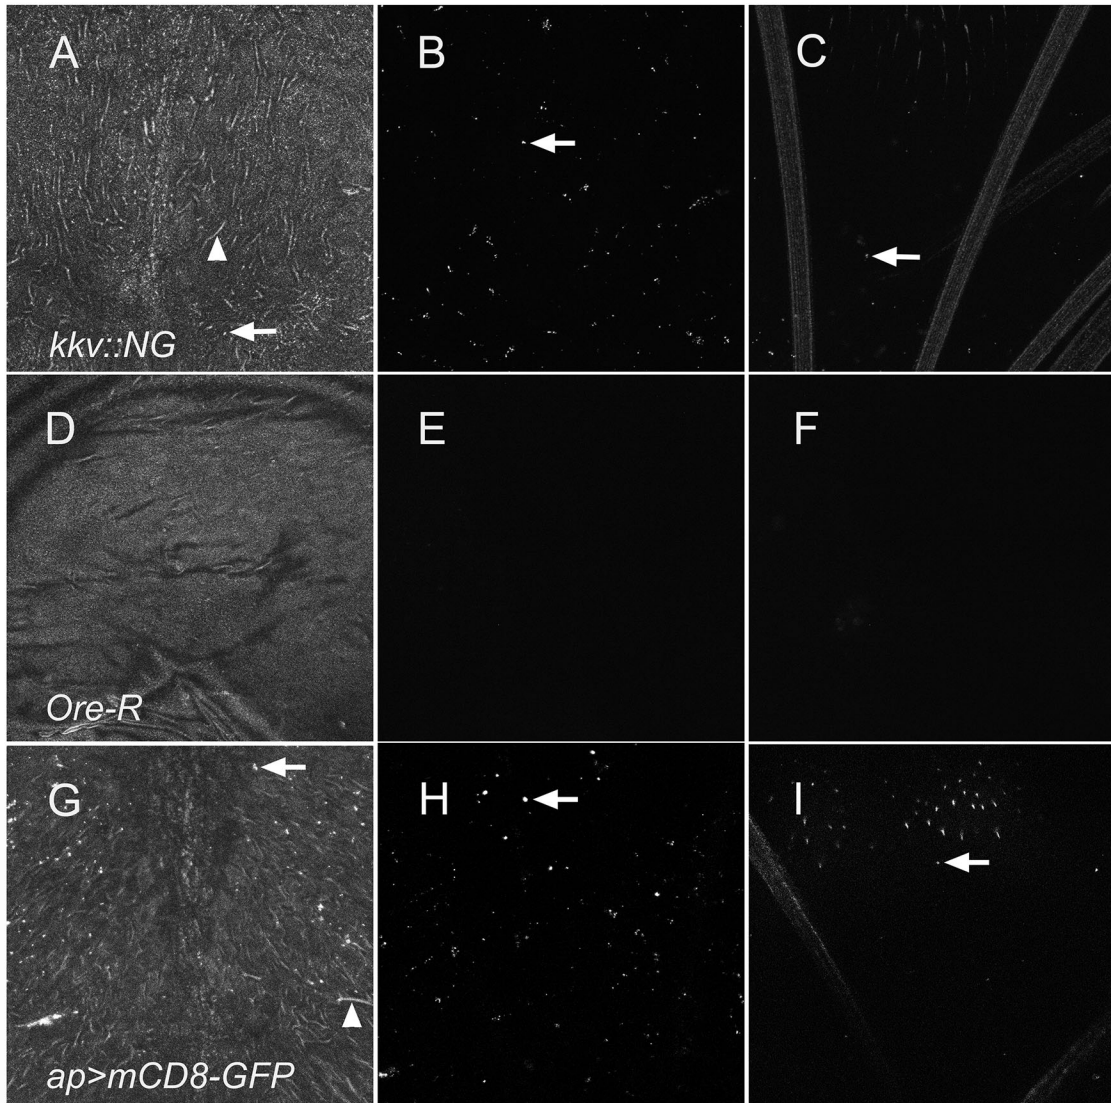

Figure 7

*kkv* clone

**A**

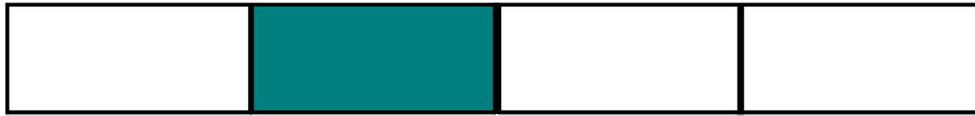

*No effect  
on cuticle*

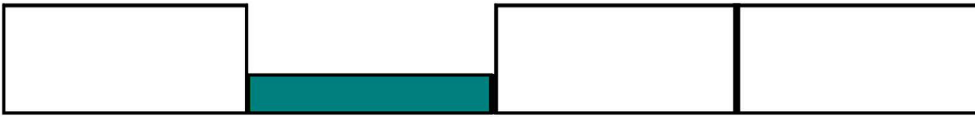

*Complete  
cell  
autonomy*

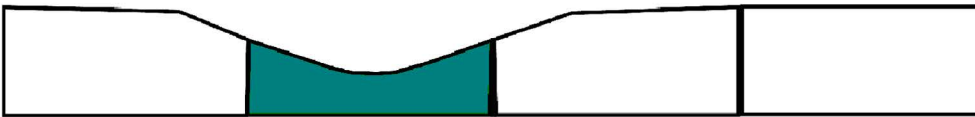

*Partial cell  
non-autonomy*

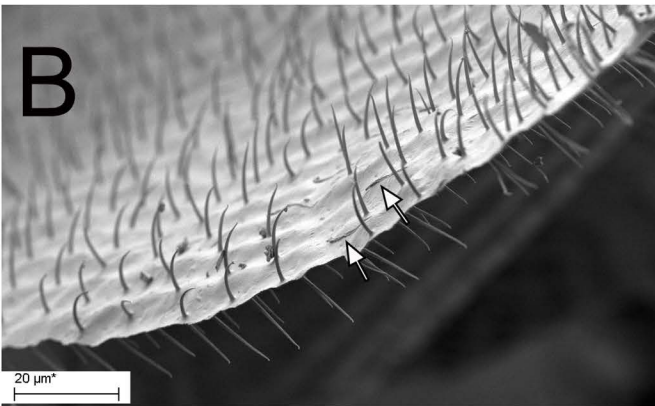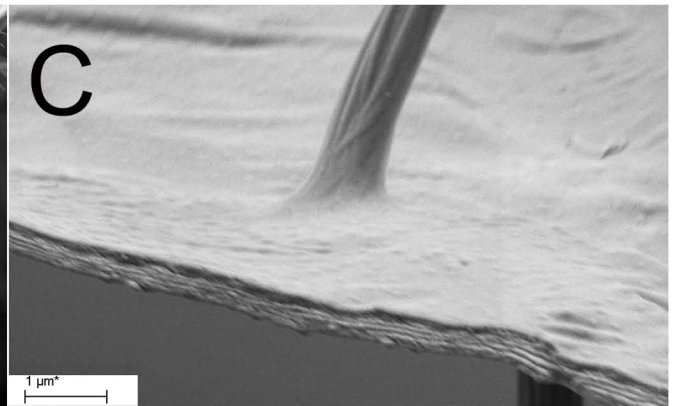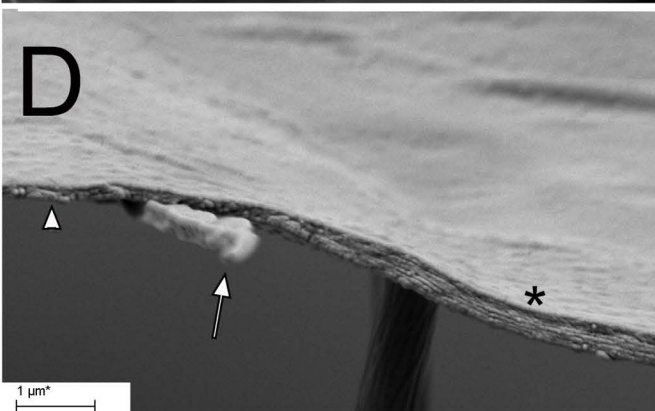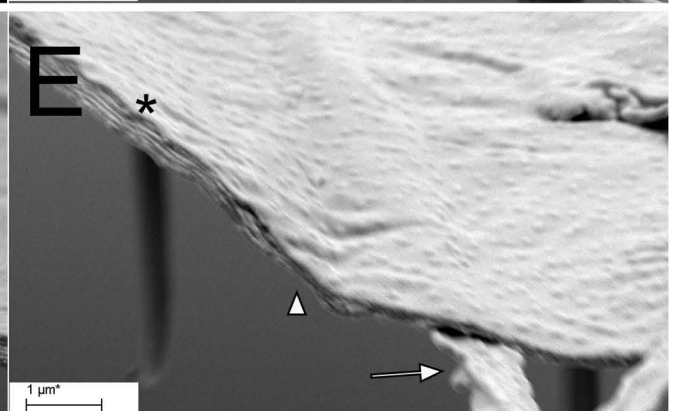

**Figure 8**
